# Supplementary material for: Sterol profiling of Leishmania parasites using a new HPLC-tandem mass spectrometry-based method and antifungal azoles as chemical probes reveals a key intermediate sterol that supports a branched ergosterol biosynthetic pathway
Source: PubMed Central journal article supplement — Int J Parasitol Drugs Drug Resist. 2022 Aug 15;20:27–42. doi: 10.1016/j.ijpddr.2022.07.003 (PMC9418051; doi:10.1016/j.ijpddr.2022.07.003), 2022-08-15

## Supplemental Figure Legends

**Figure S1. CID MS/MS fragmentation spectra of lanosterol, T-MAS, zymosterol and ergosterol standards.**

**Figure S2. Effect of PSZ and FLU on the proliferation of *L. donovani* promastigotes.** The growth of *L. donovani* LV82 promastigotes was determined in the presence or absence of PSZ or FLU for 72 h as outlined in the Methods section. Data shown represent biological replicates for PSZ (n=6 determinations) and FLU (n=4 determinations). The PSZ data was fitted using the four parameter equation  $y = m1 + (m2 - m1)/[1 + (x/m3)^{m4}]$  from GraphPad Prism (v. 9.3.1 San Diego, CA) and then the absolute IC<sub>50</sub> value was determined as in Joice *et al.*<sup>30</sup> to be 2.8 μM. The IC<sub>50</sub> value for FLU could not be ascertained as growth inhibition did not reach 50% at the highest FLU concentration tested, indicating an IC<sub>50</sub> > 100 μM. For both PSZ and FLU, error bars represent the standard error of the biological replicates.

**Figure S3. Effect of PSZ and FLU on the proliferation of *L. tarentolae* promastigotes.** The growth of *L. tarentolae* UC strain promastigotes was determined in the presence or absence of PSZ or FLU for 72 h as outlined in the Methods section. Symbols and error bars represent the mean and standard error of biological triplicates. Data were fitted using the four parameter equation  $y = m1 + (m2 - m1)/[1 + (x/m3)^{m4}]$  from GraphPad Prism (v. 9.3.1 San Diego, CA). The PSZ data did not fit the four parameter equation above ( $R^2 < 0.5$ ); the absolute IC<sub>50</sub> value for FLU was determined as in Joice *et al.*<sup>30</sup> to be 170 μM.

**Figure S4. <sup>1</sup>H NMR spectra of (A) lanosterol standard and (B) the purified unknown intermediate sterol 4,14-dimethylzymosterol.**

**Figure S5. <sup>13</sup>C NMR spectra of (A-C) lanosterol standard and (D-F) the purified unknown intermediate sterol 4,14-dimethylzymosterol.**

**Figure S6. HMBC NMR spectra of (A-C) lanosterol standard and HMBC (D-E) and HSQC (F) NMR spectra the purified unknown intermediate sterol 4,14-dimethylzymosterol.**

Figure S1. CID MS/MS fragmentation spectra of lanosterol, T-MAS, zymosterol and ergosterol standards.

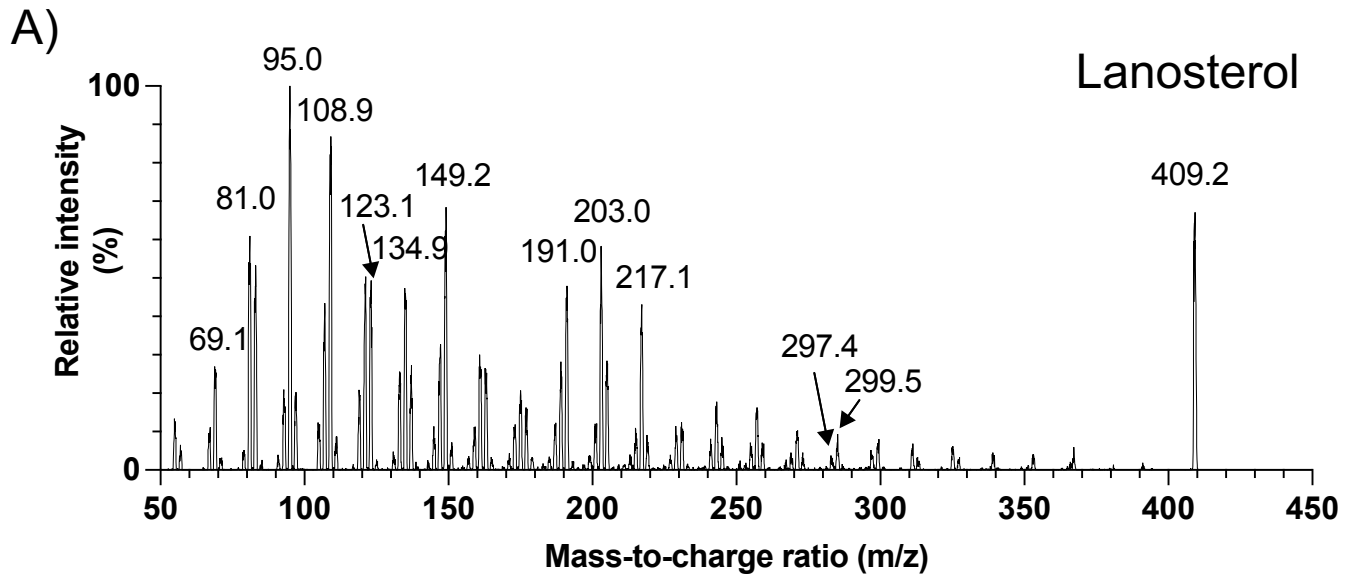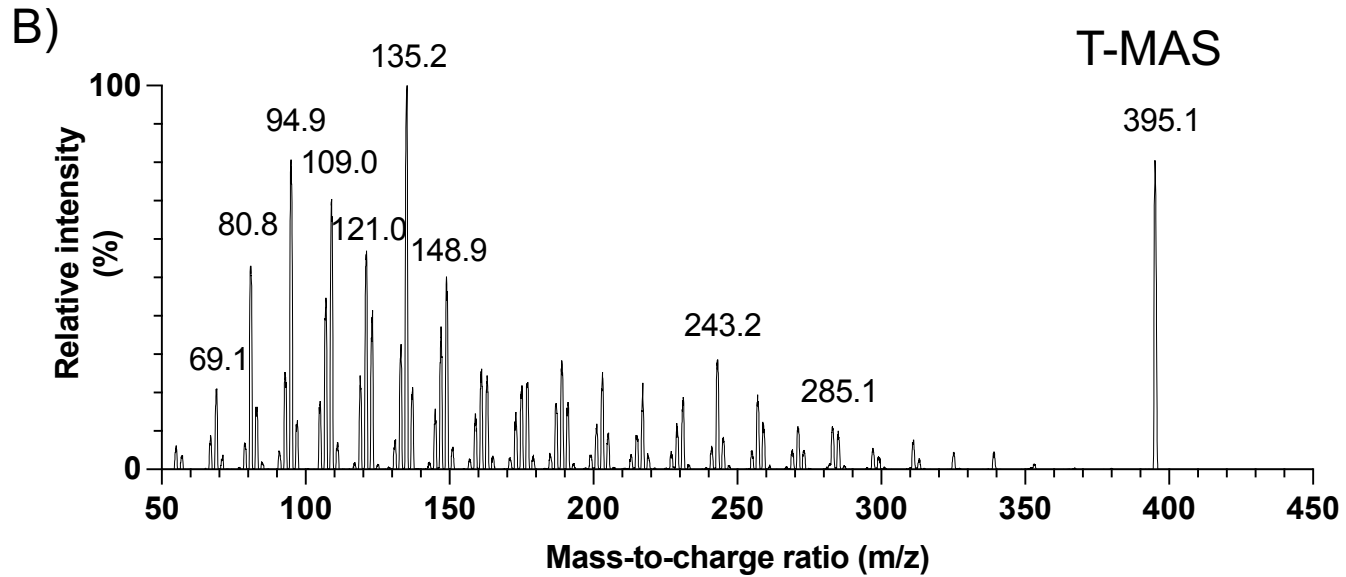

Figure 1S - Cont'd

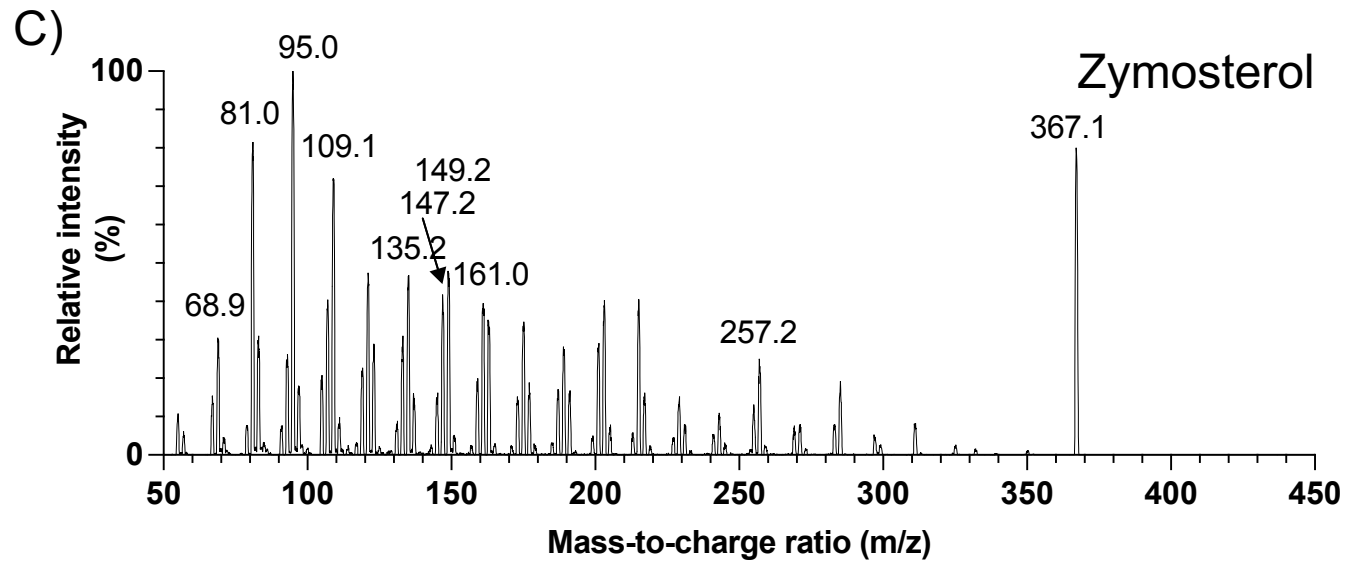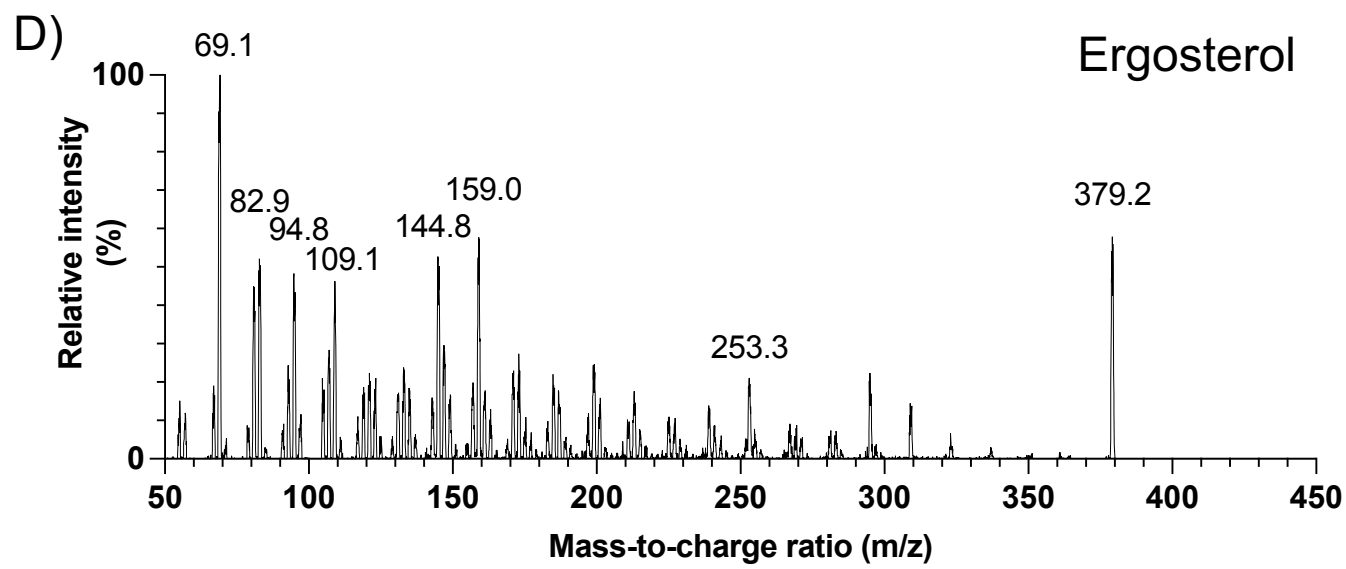

Figure S2. Effect of PSZ and FLU on the proliferation of *L. donovani* promastigotes.

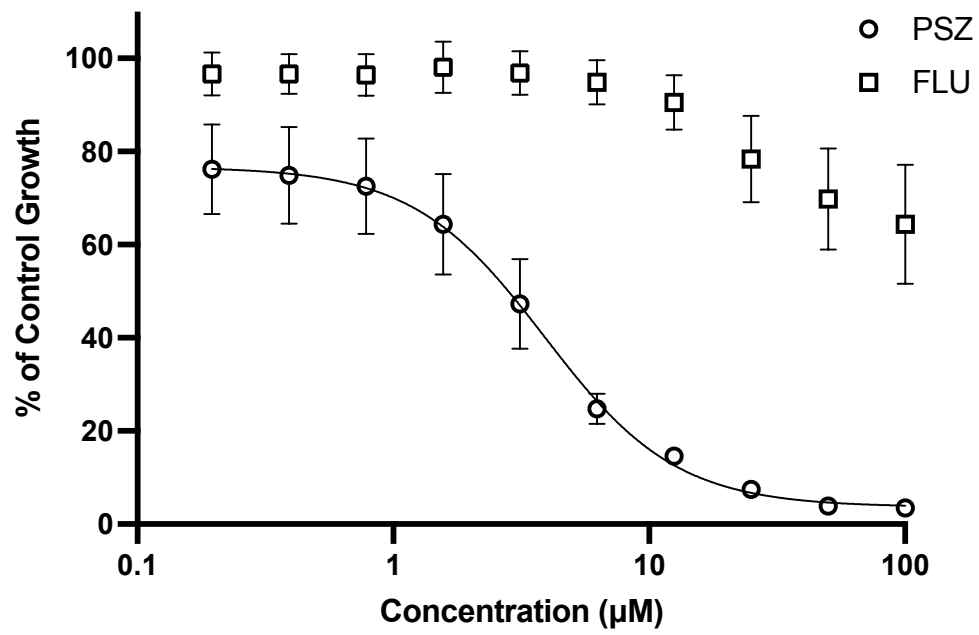

Figure S3. Effect of PSZ and FLU on the proliferation of *L. tarentolae* promastigotes.

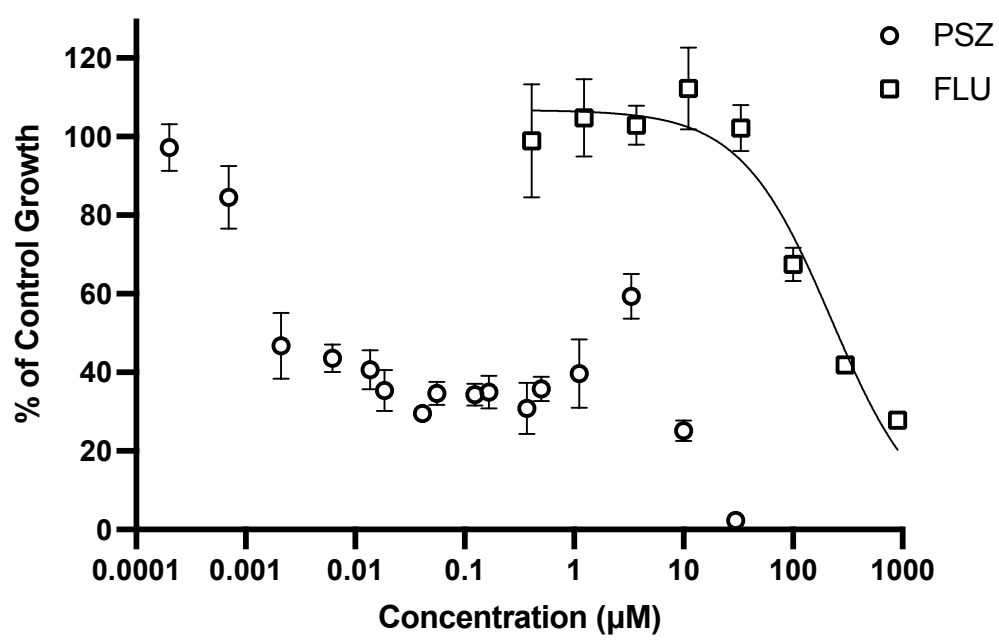

Figure S4. <sup>1</sup>H NMR spectra of (A) lanosterol standard and (B) the purified unknown intermediate sterol 4,14-dimethylzymosterol.

A) Lanosterol <sup>1</sup>H

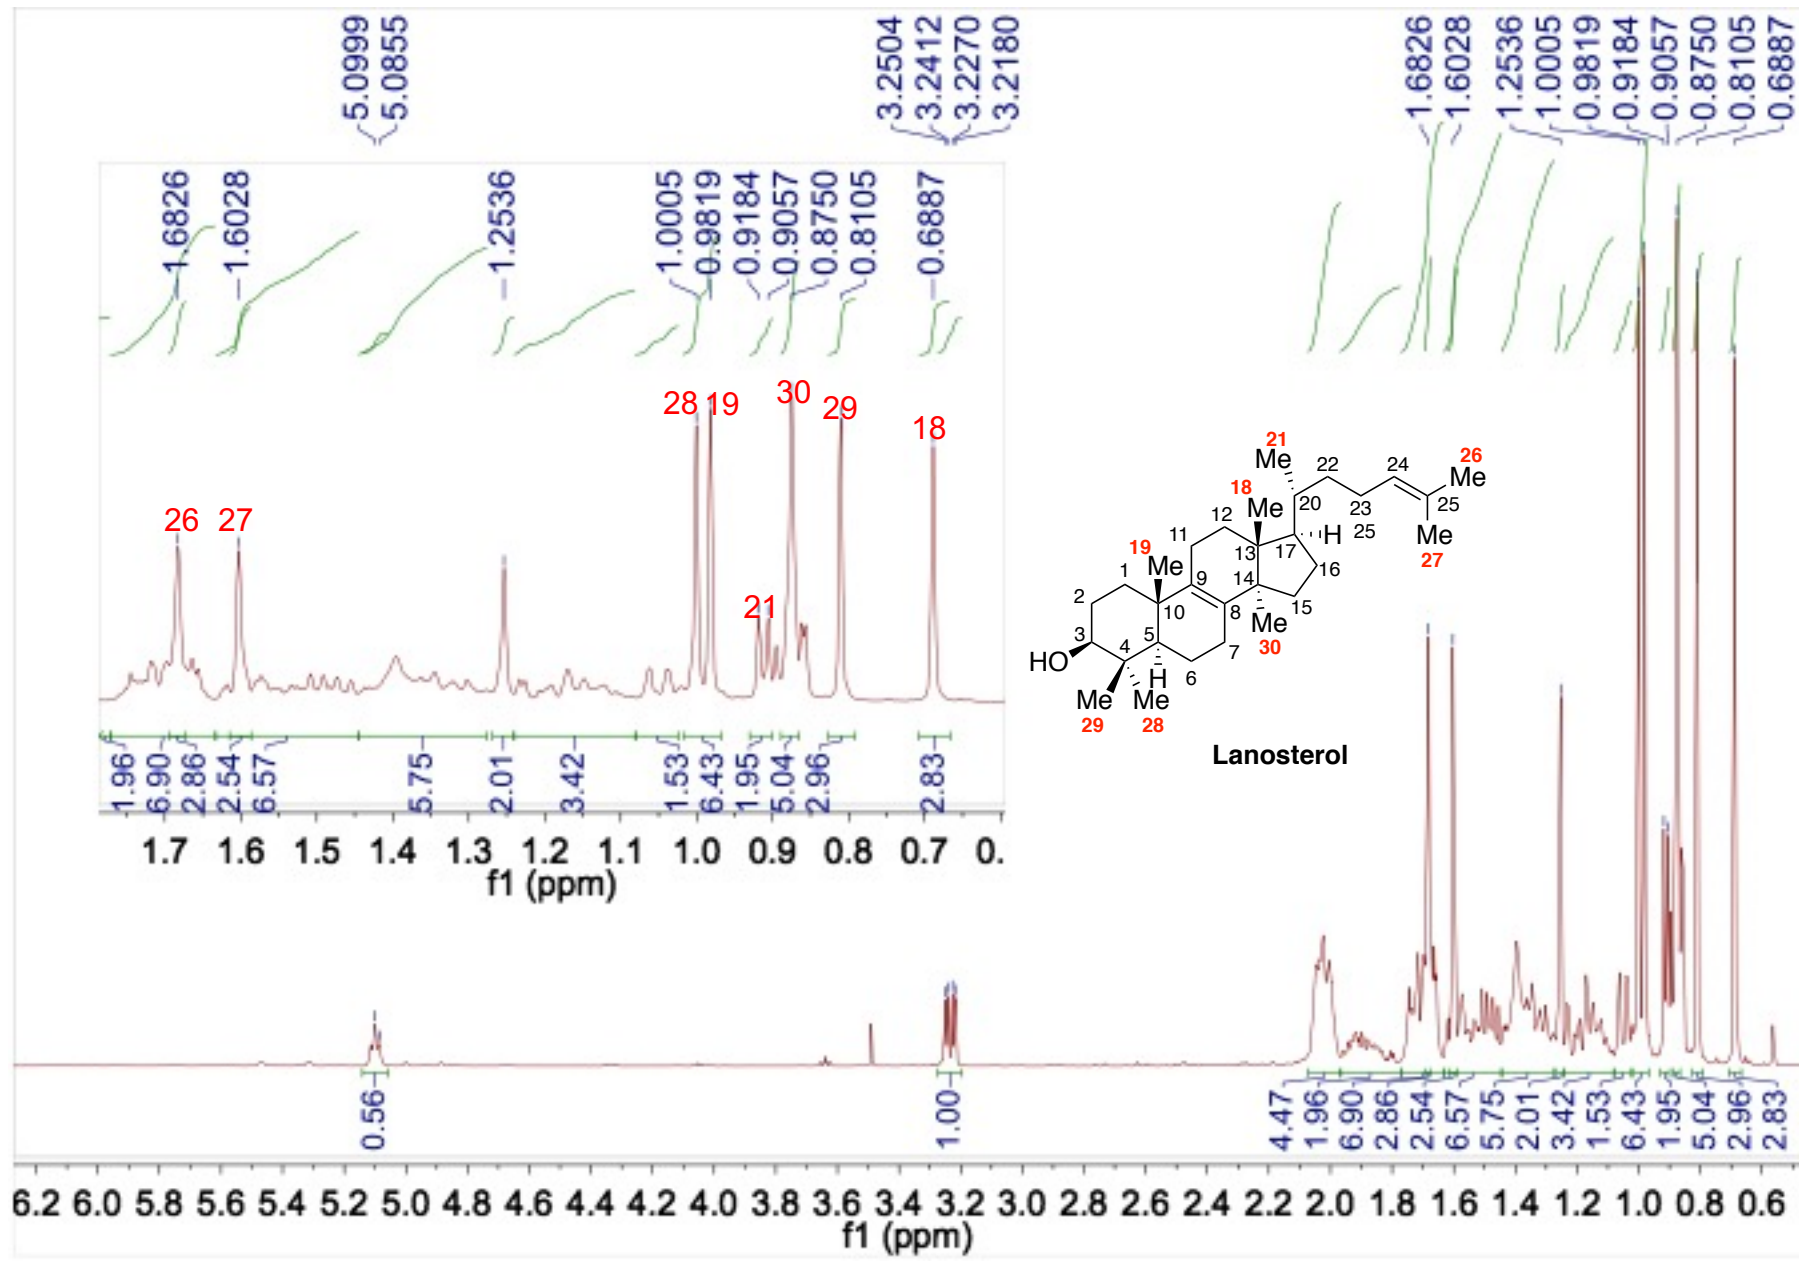

Figure S4. cont'd

B) Unknown <sup>1</sup>H

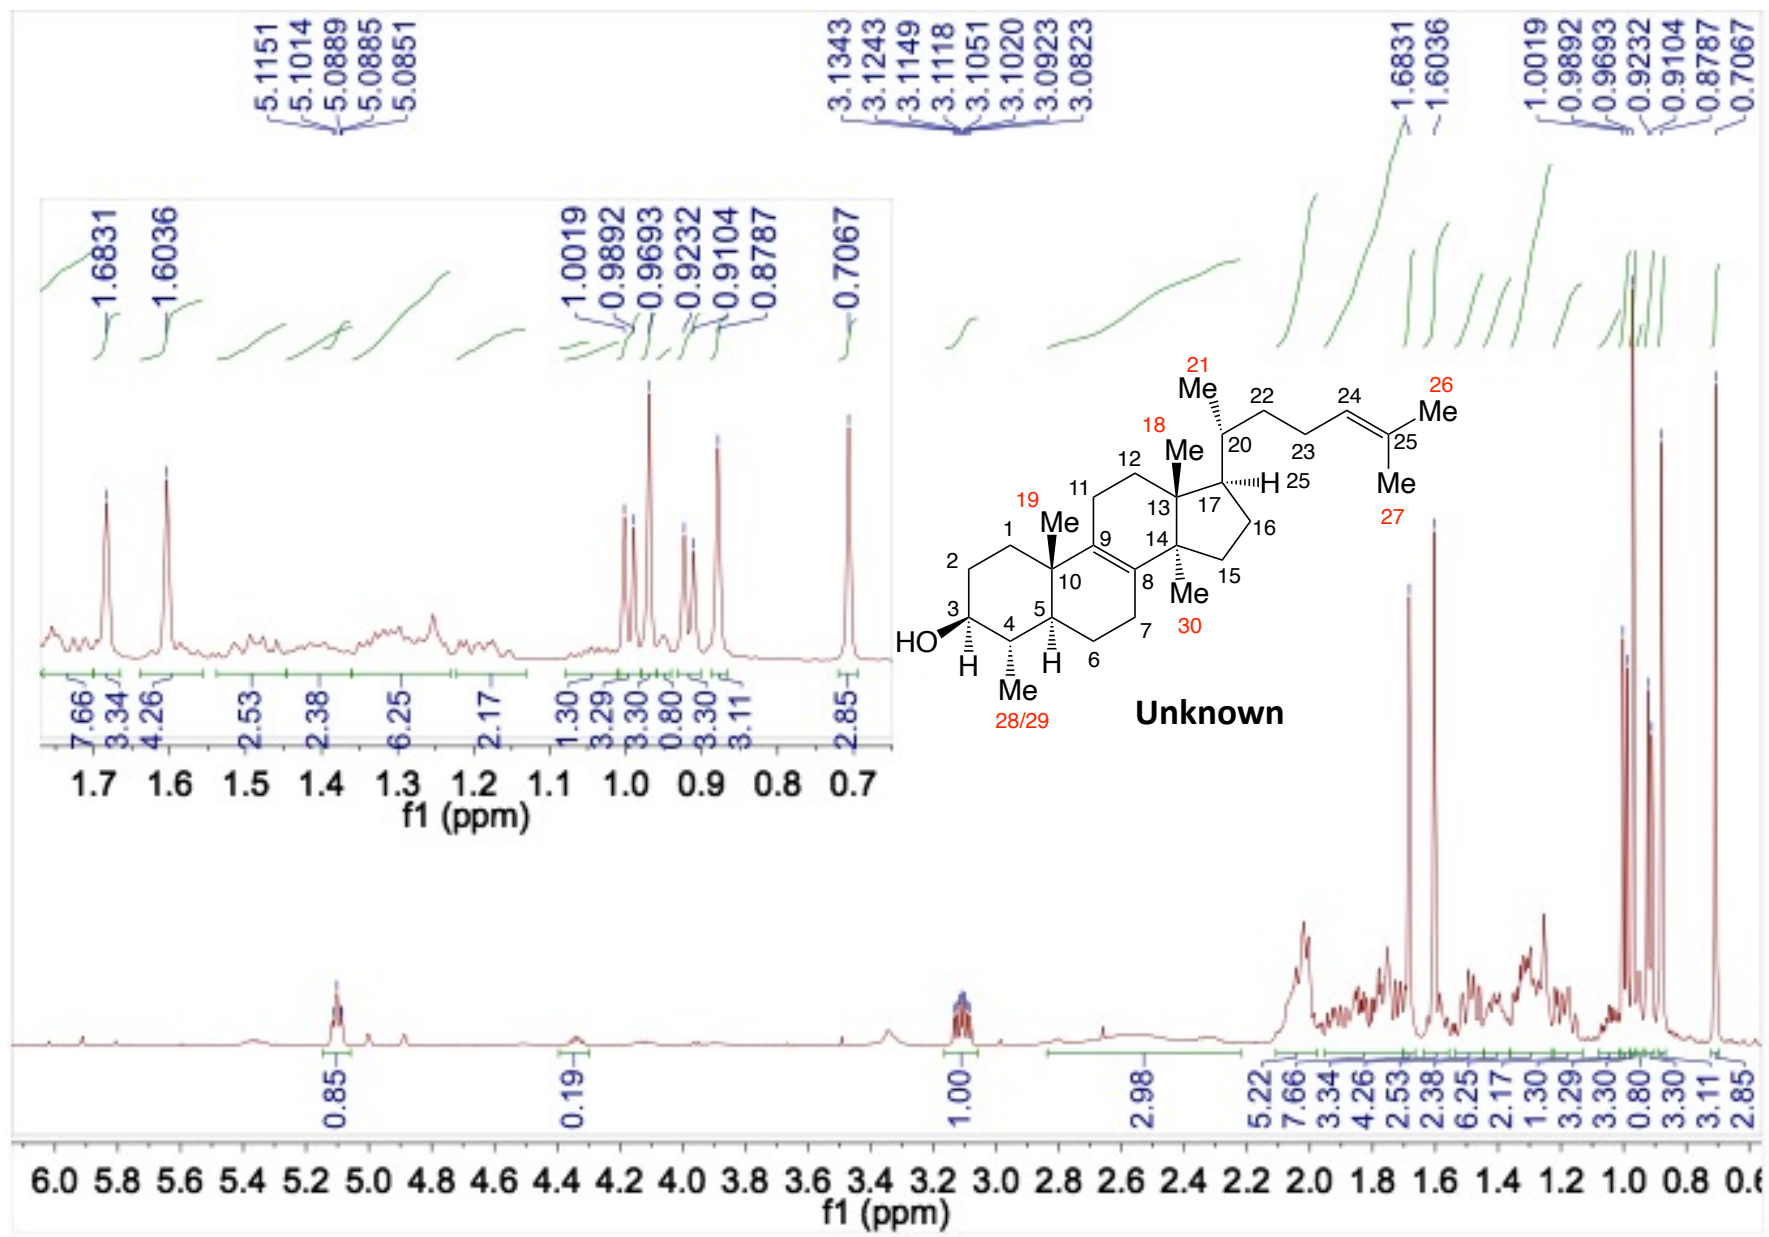

Figure S5.  $^{13}\text{C}$  NMR spectra of (A-C) lanosterol standard and (D-F) the purified unknown intermediate sterol 4,14-dimethylzymosterol.

A) Lanosterol  $^{13}\text{C}$

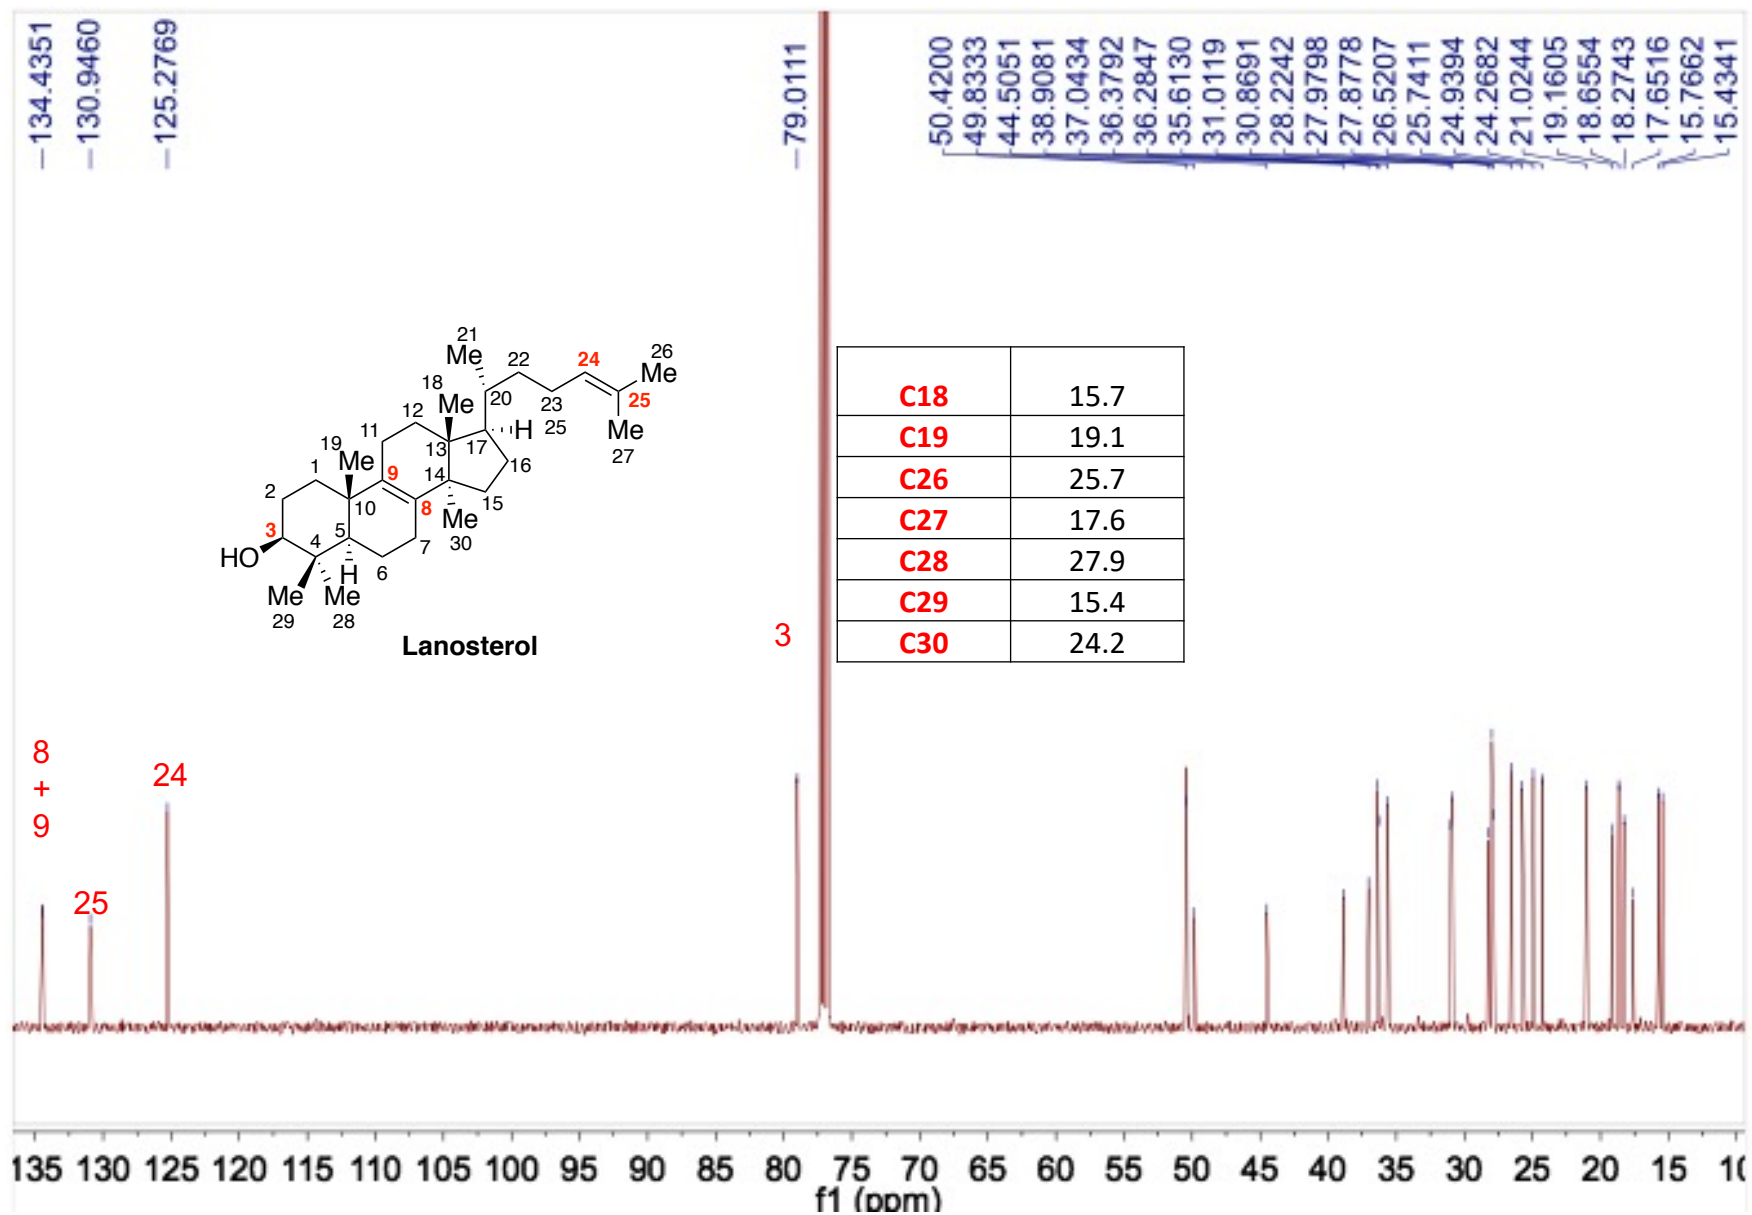



Figure S5. cont'd

B) Lanosterol DEPT vs.  $^{13}\text{C}$

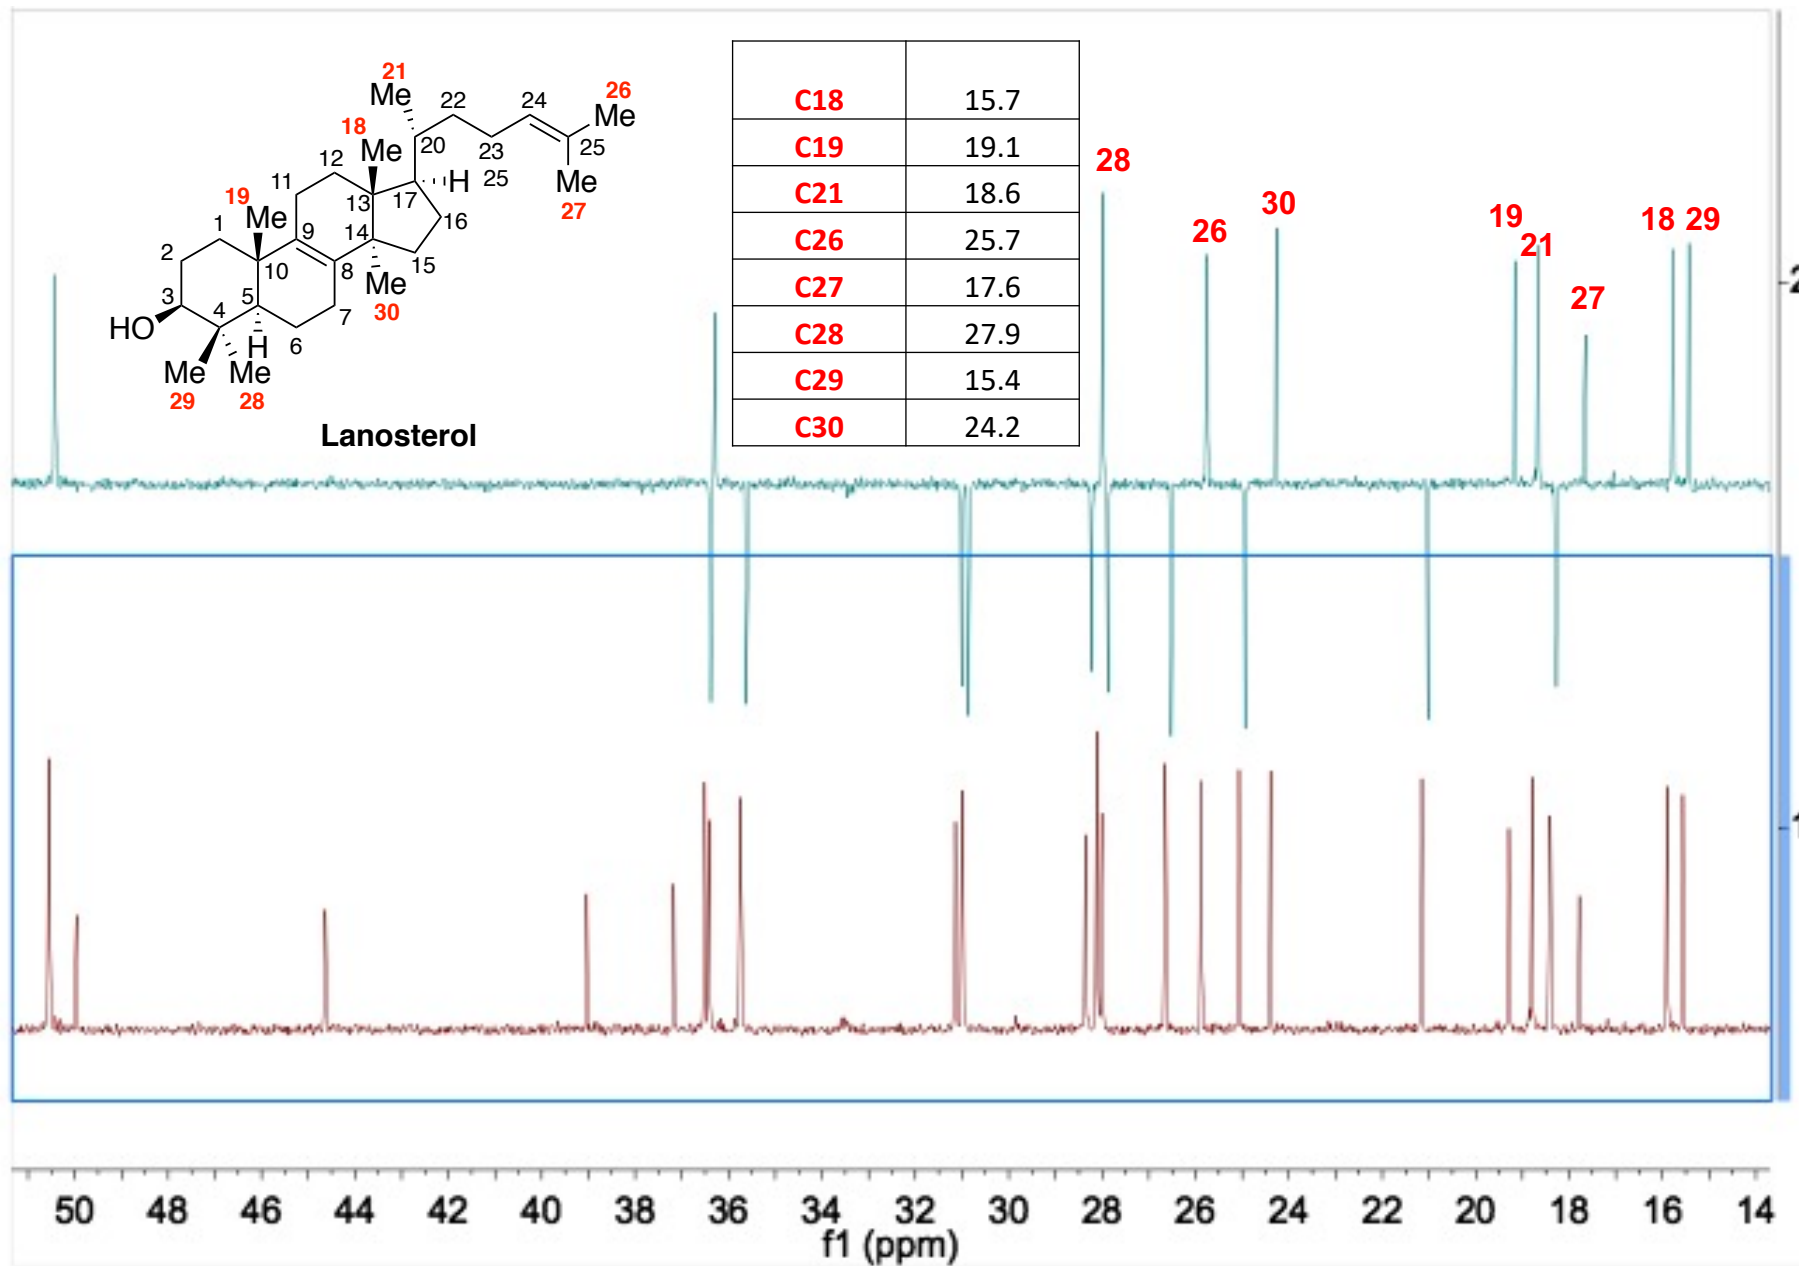

Figure S5. cont'd

C) Lanosterol DEPT vs.  $^{13}\text{C}$

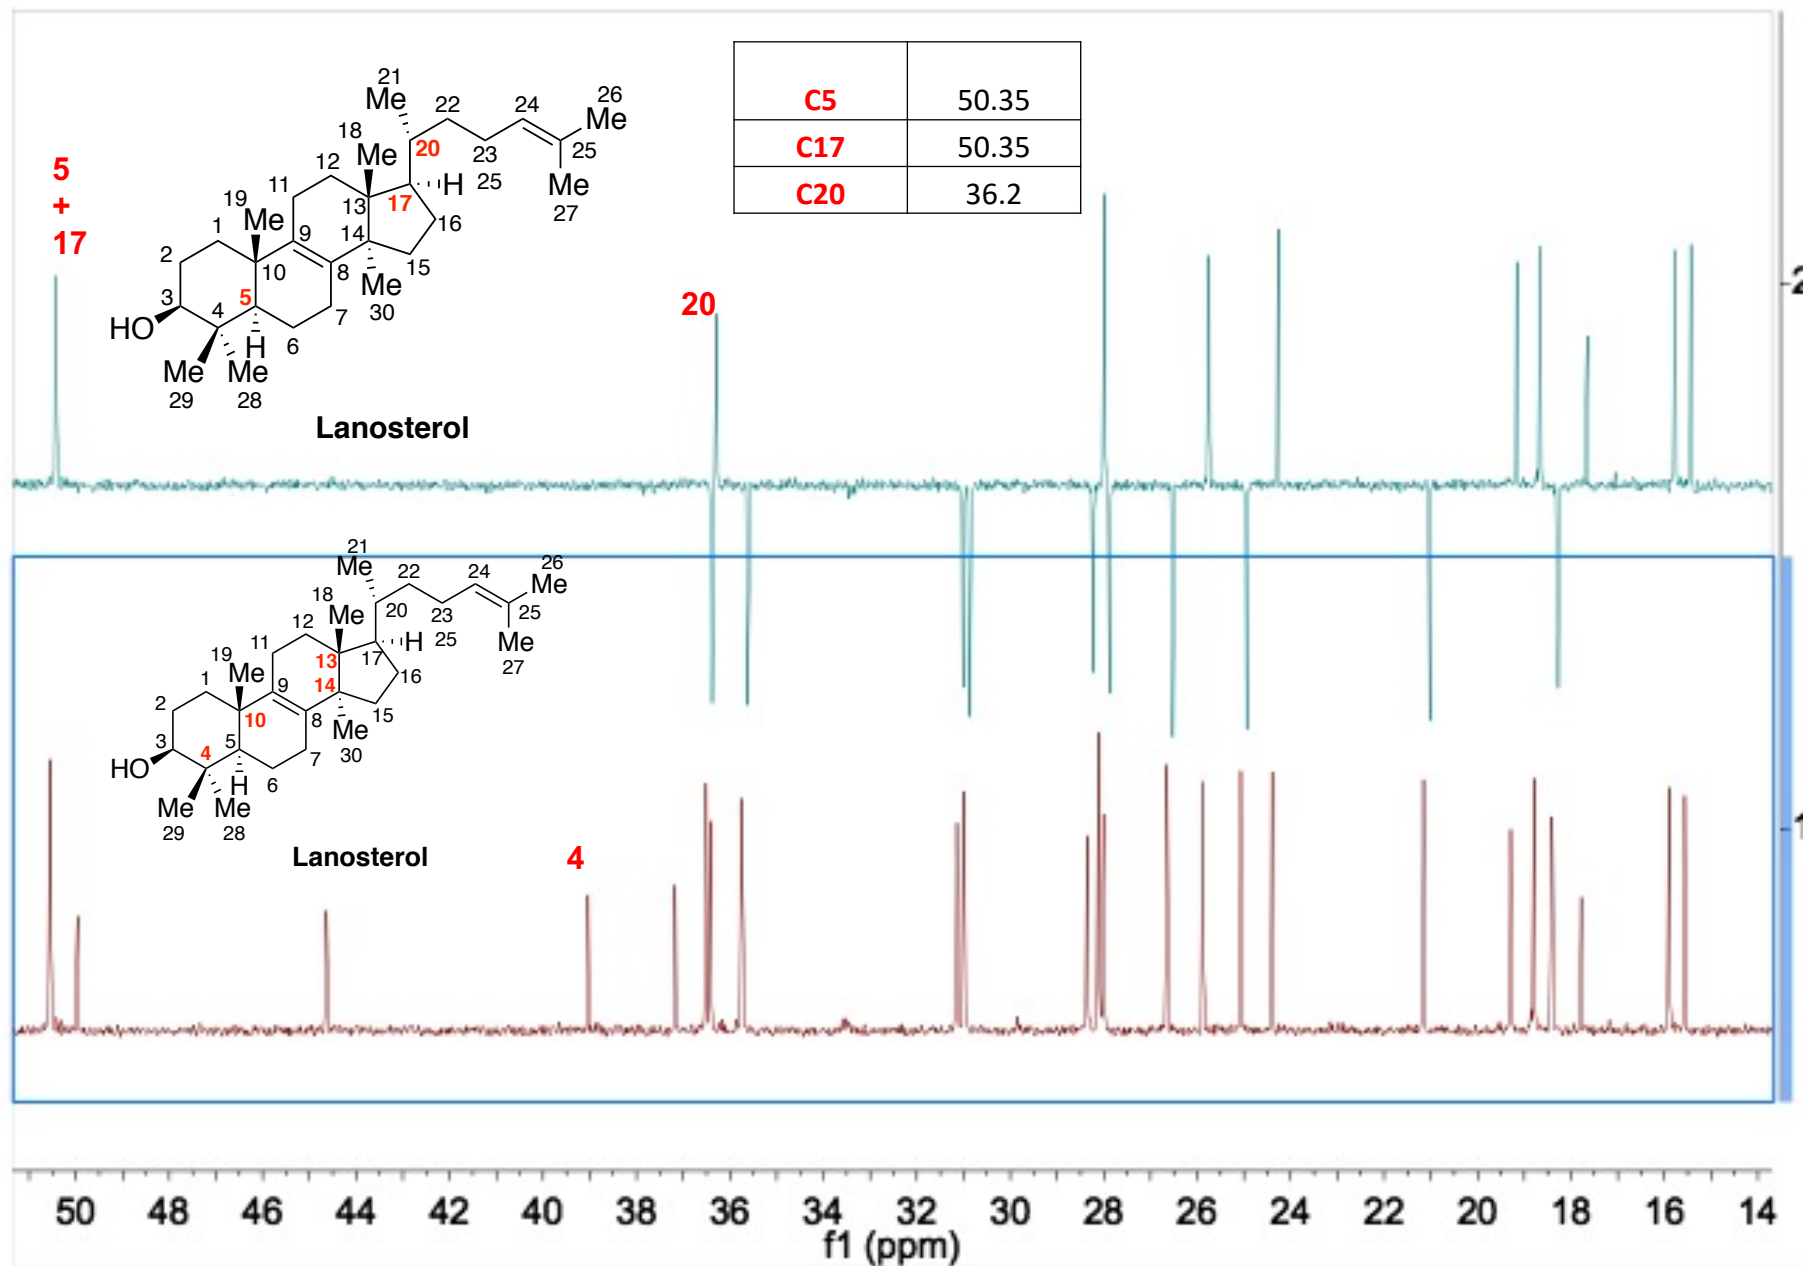

Figure S5. cont'd

D) Unknown <sup>13</sup>C

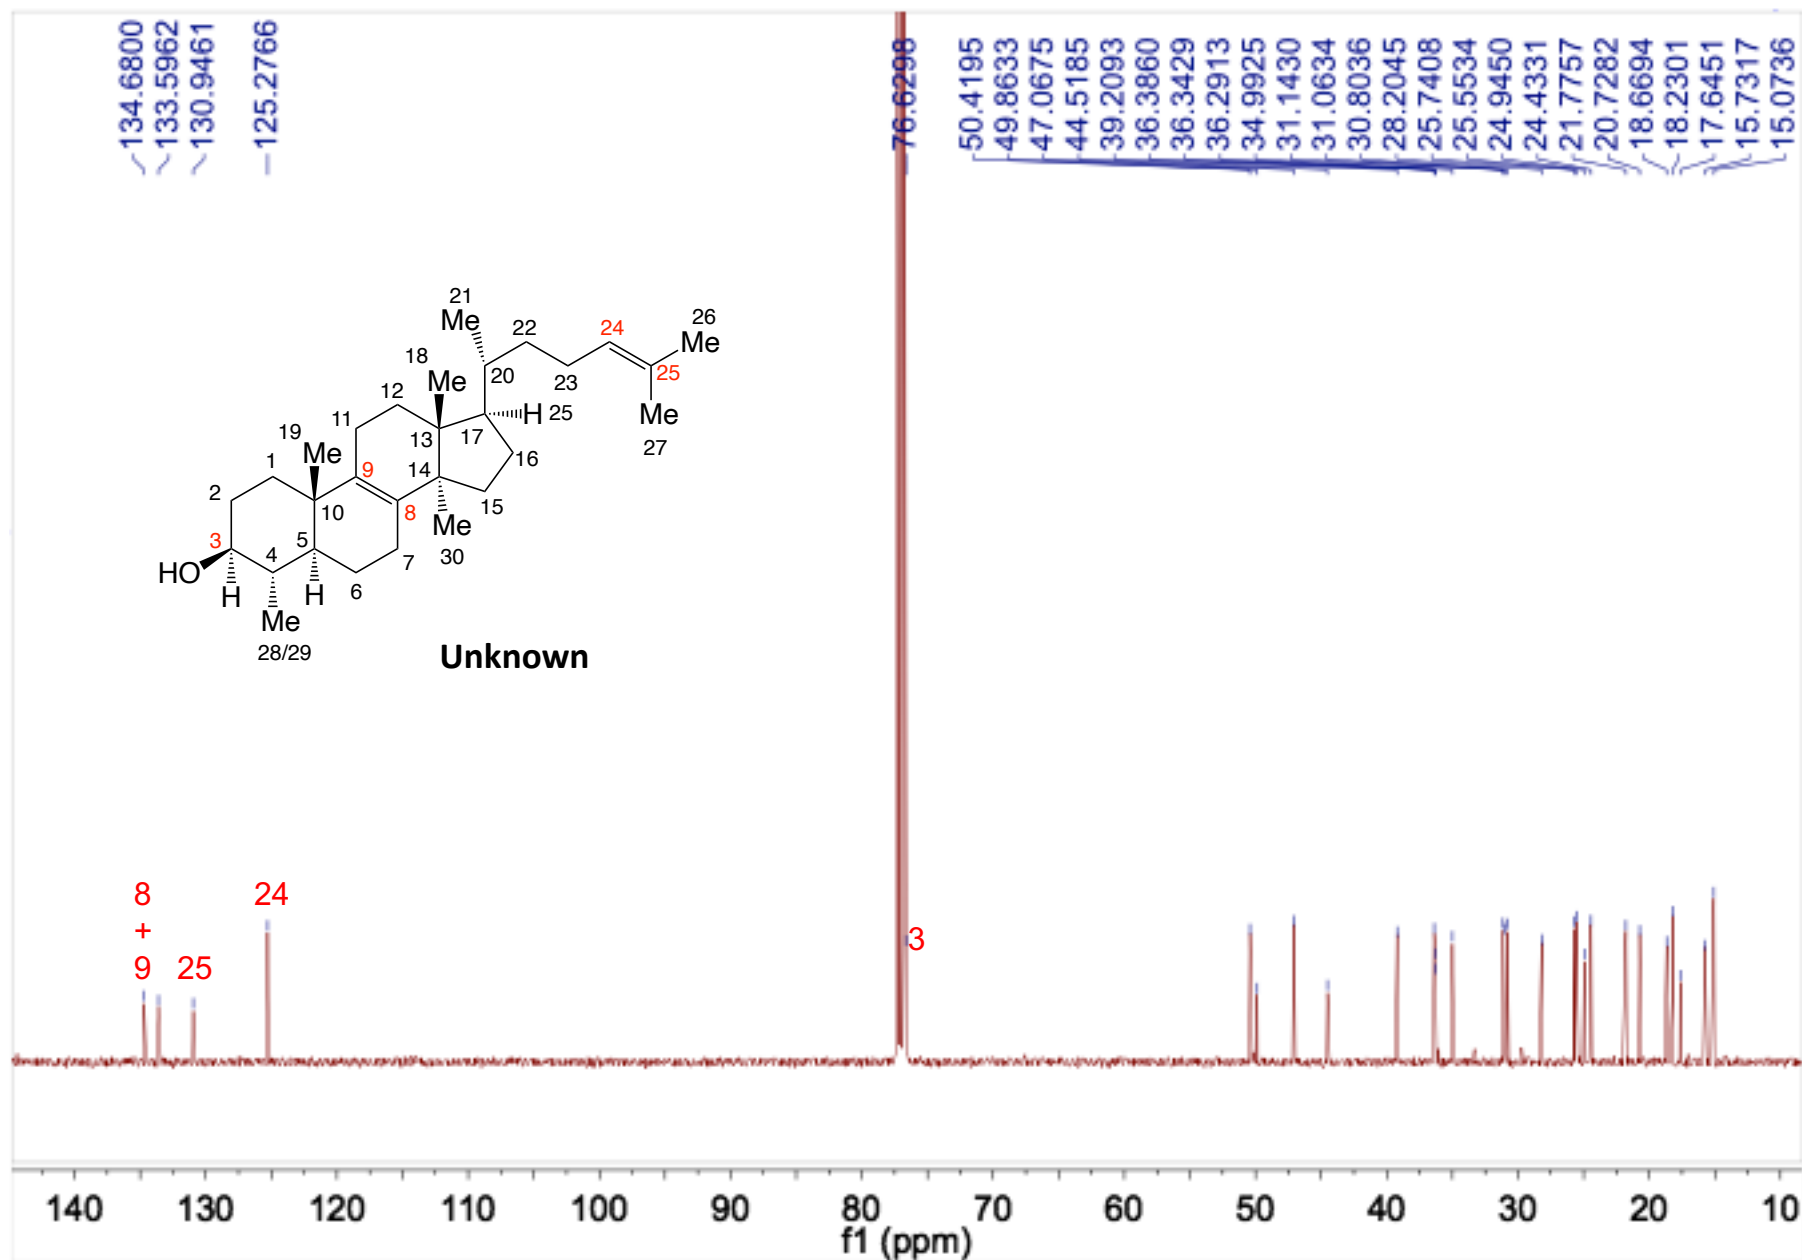

Figure S5. cont'd

E) Unknown DEPT

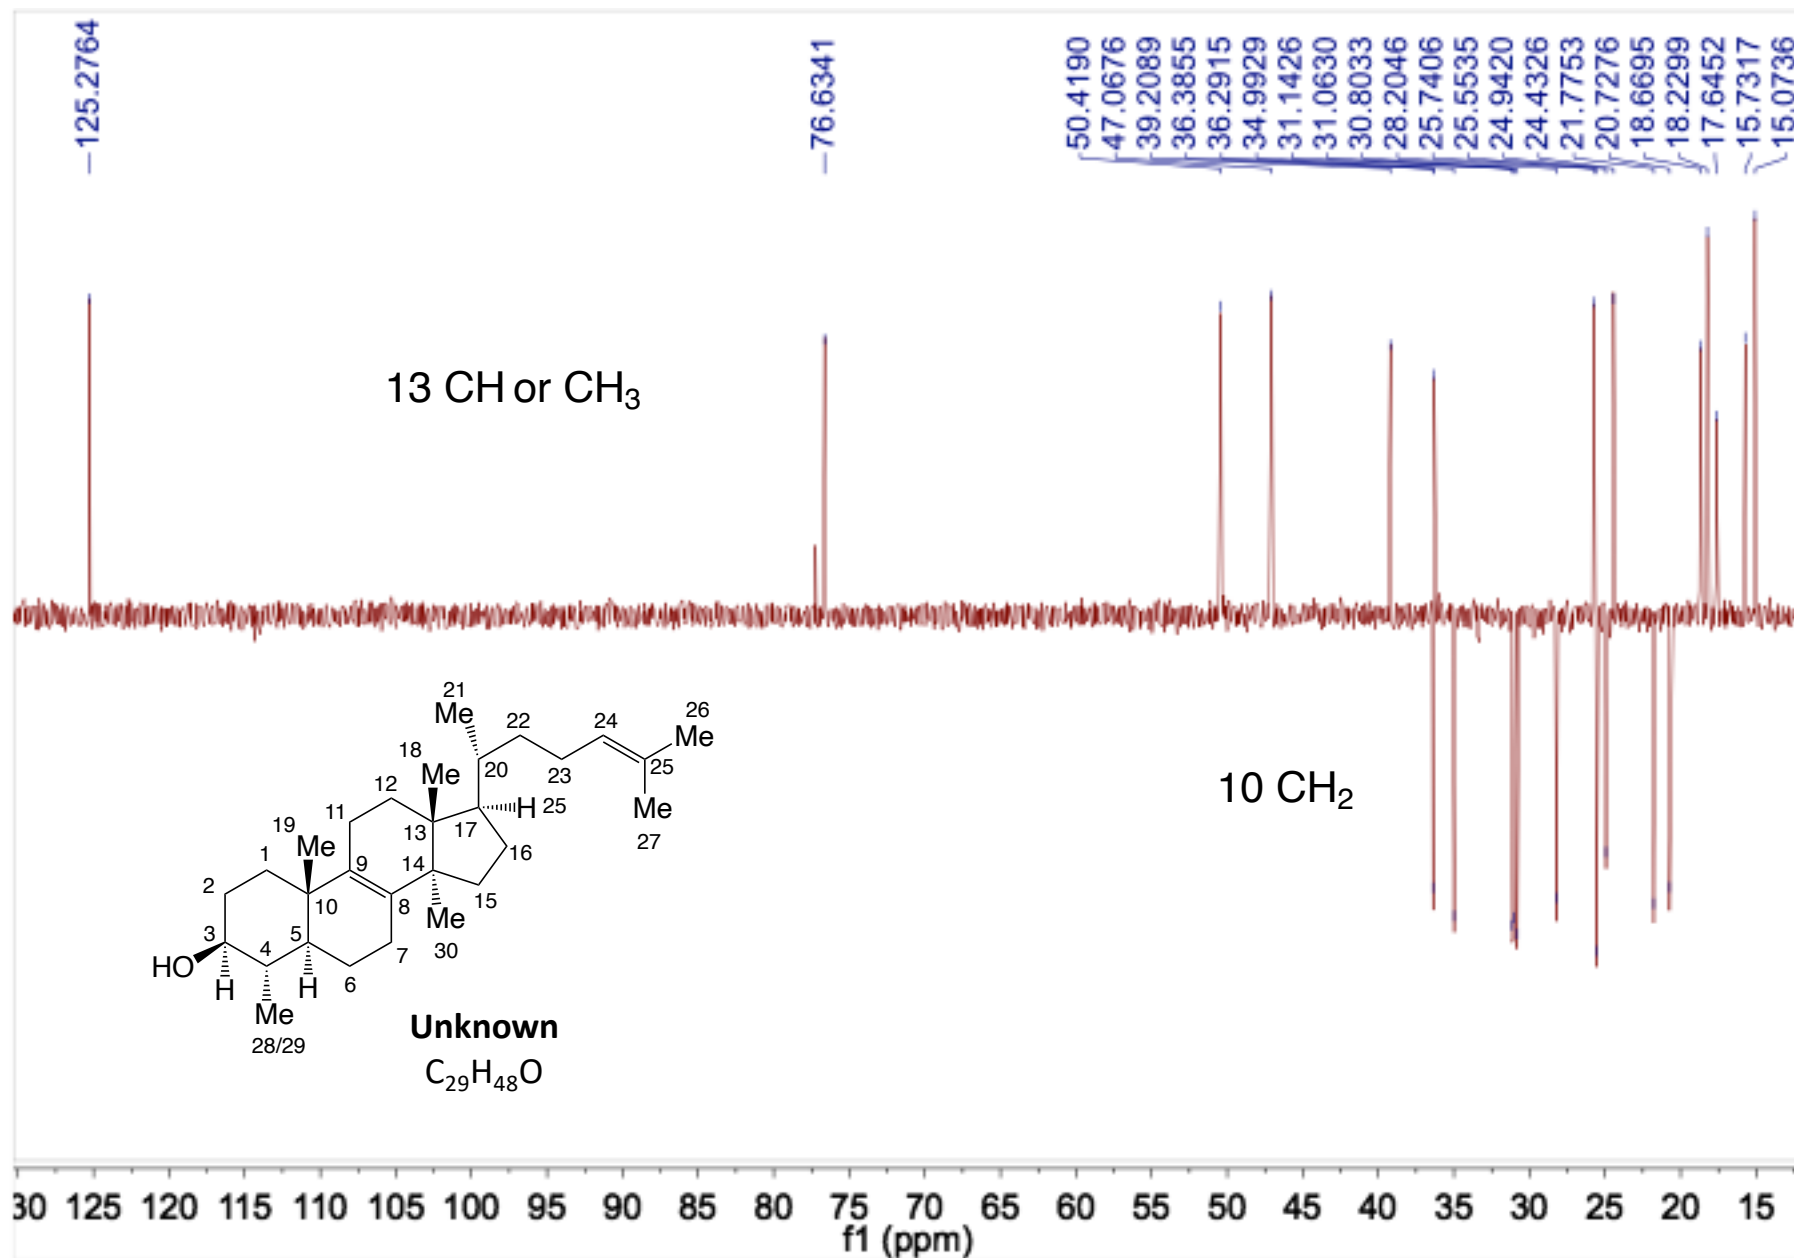

Figure S5. cont'd

F) Unknown DEPT vs.  $^{13}\text{C}$

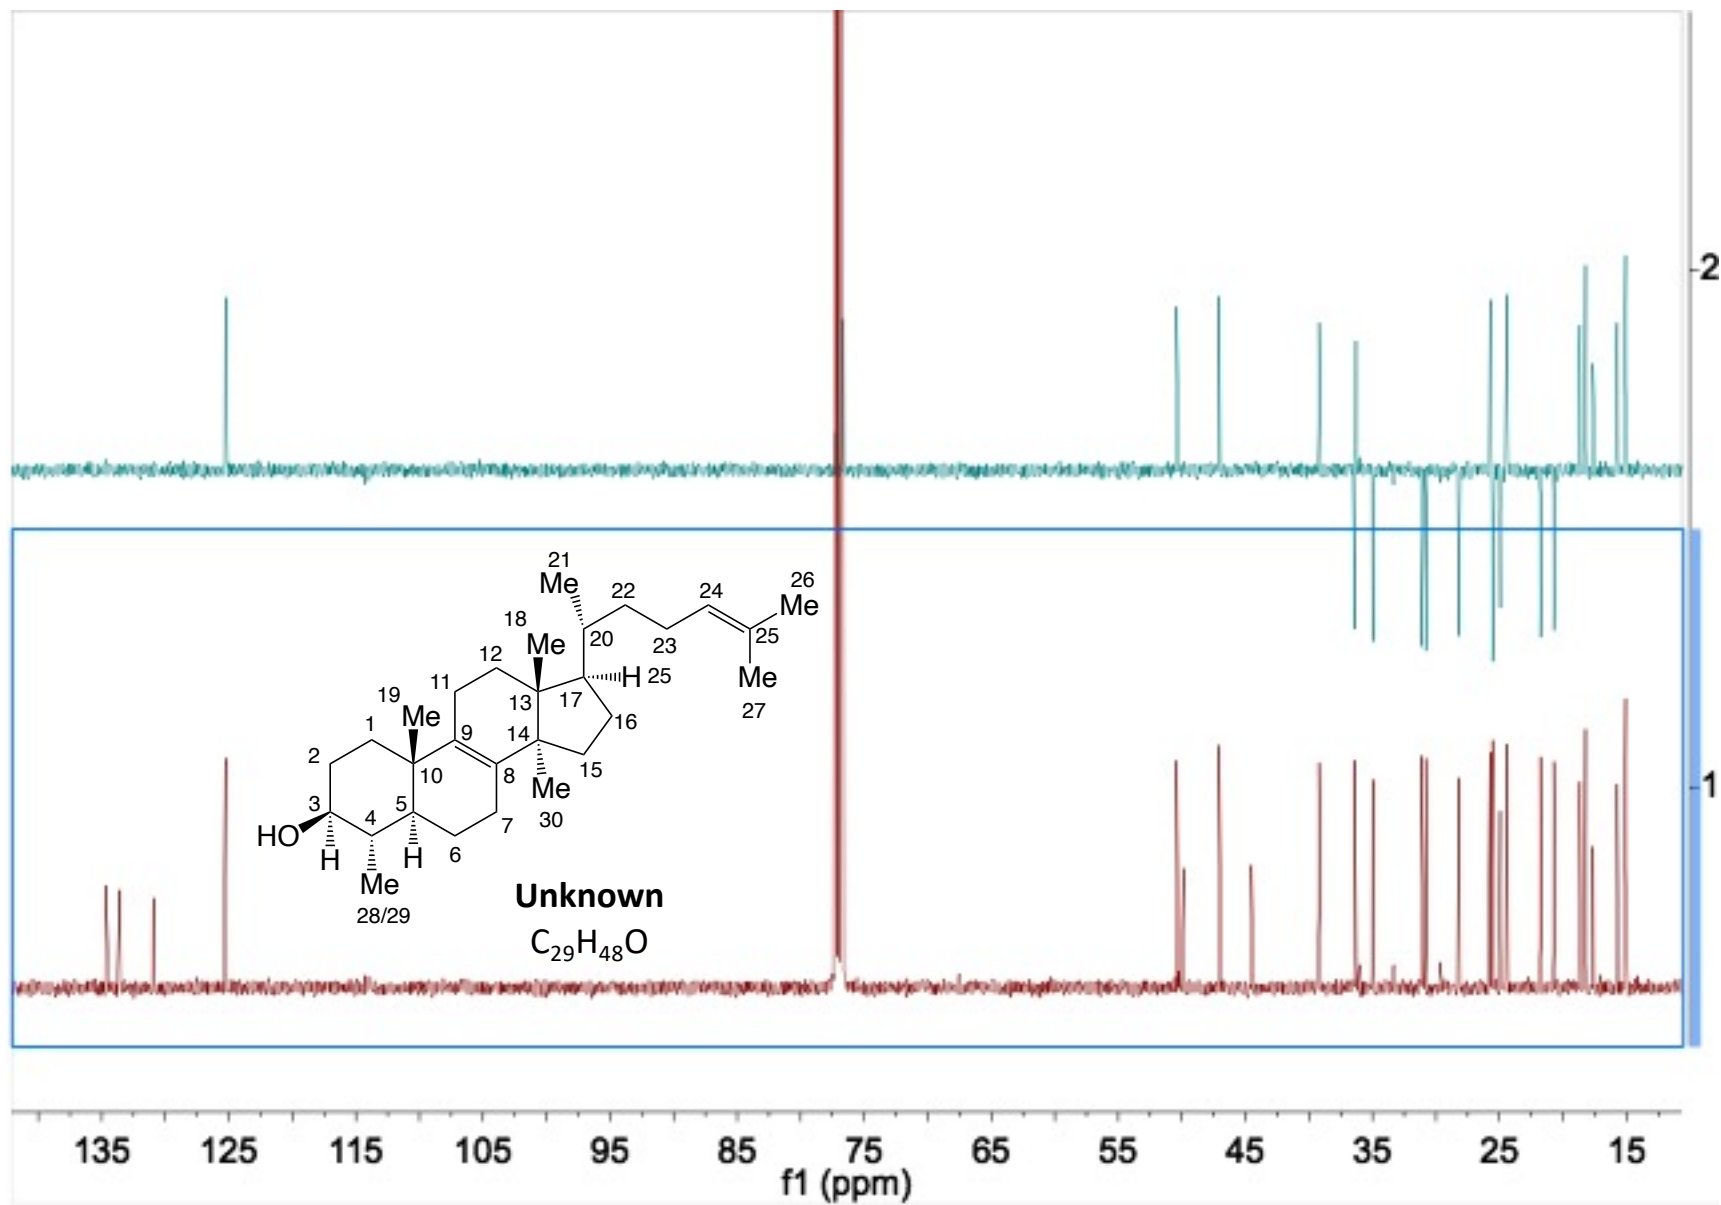

Figure S6. HMBC NMR spectra of lanosterol standard and the purified unknown intermediate sterol 4,14-dimethylzymosterol.

A) Lanosterol HMBC – H3 near C4

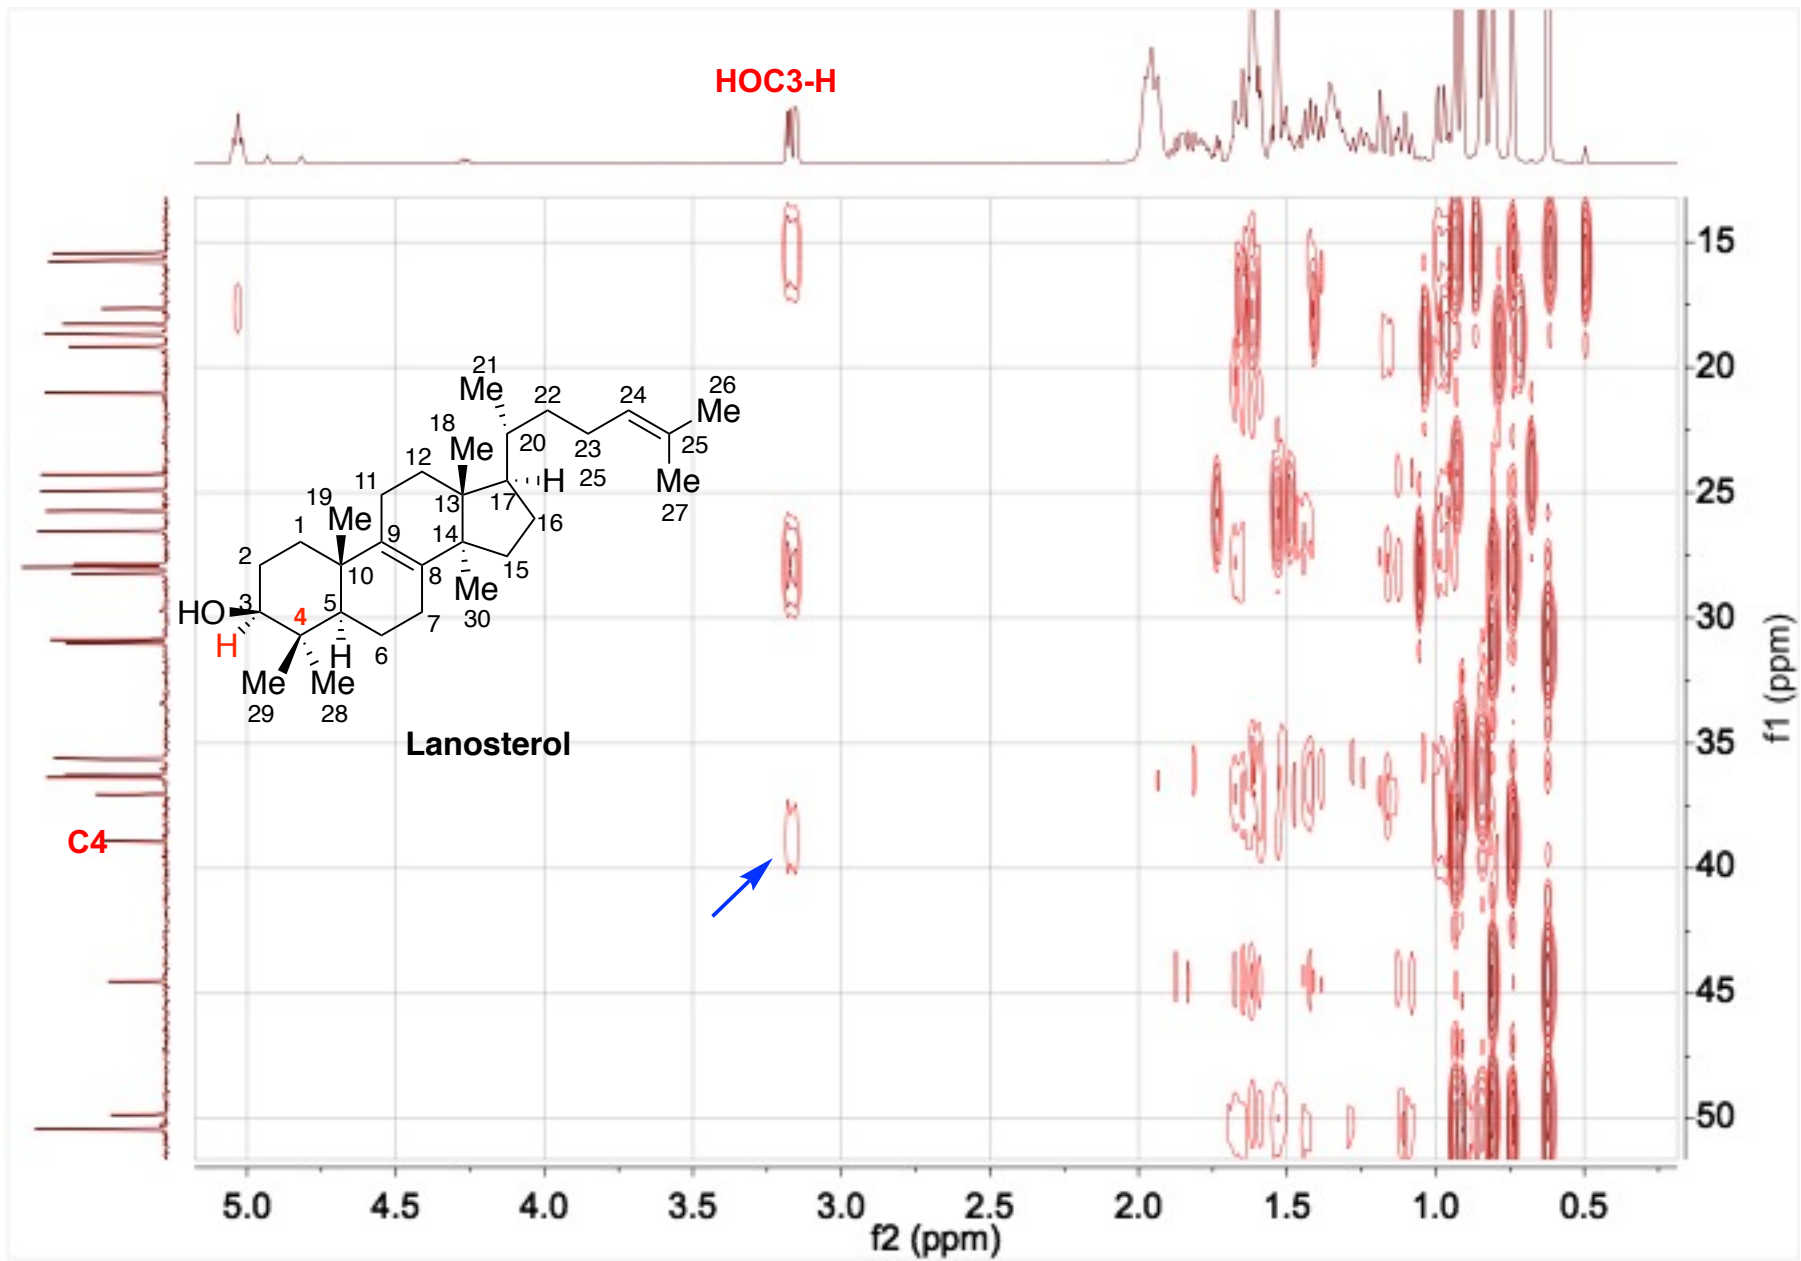

Figure S6. cont'd

B) Lanosterol HMBC

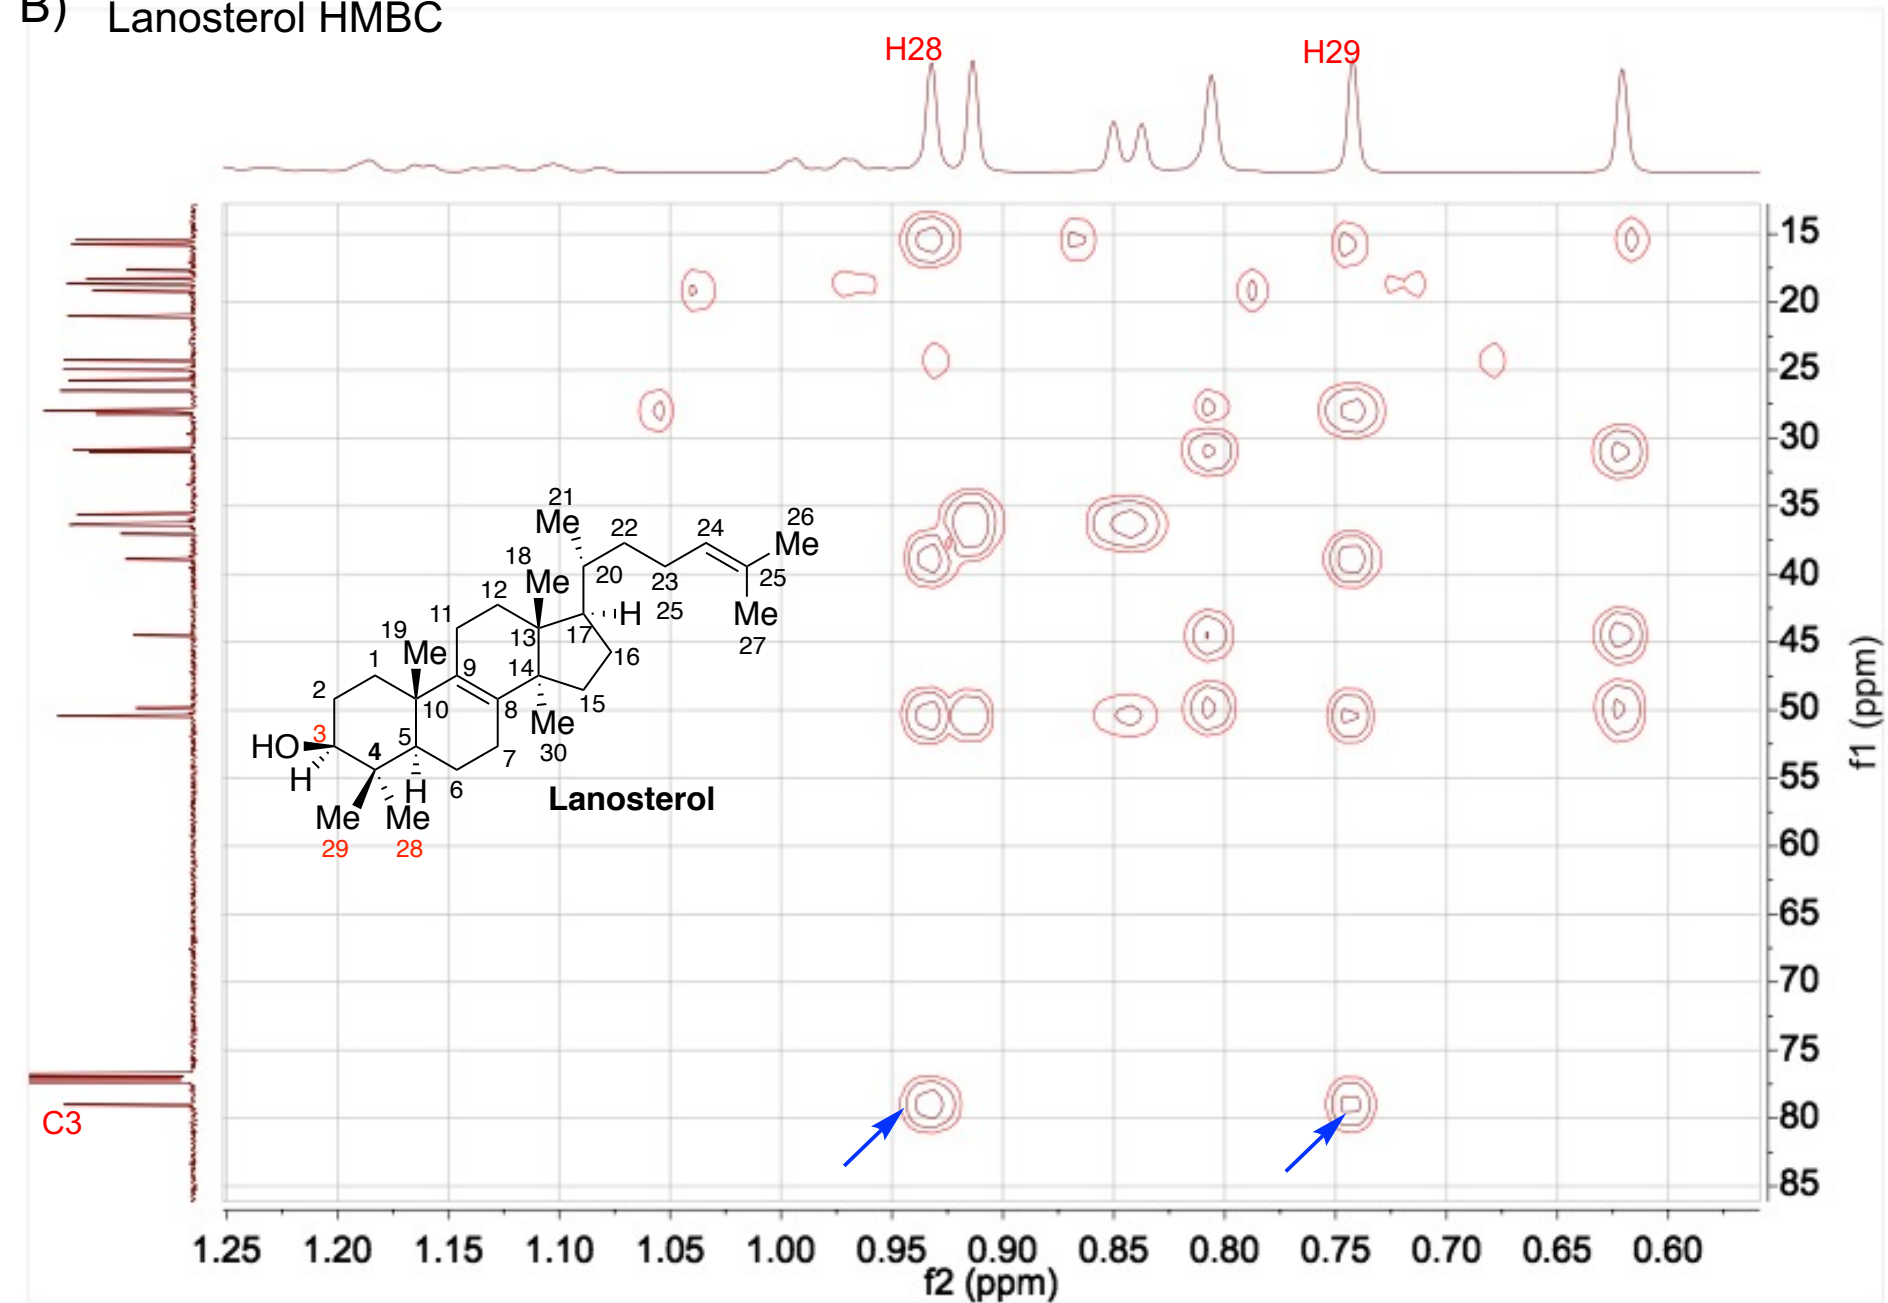

Figure S6. cont'd

C) Lanosterol HMBC

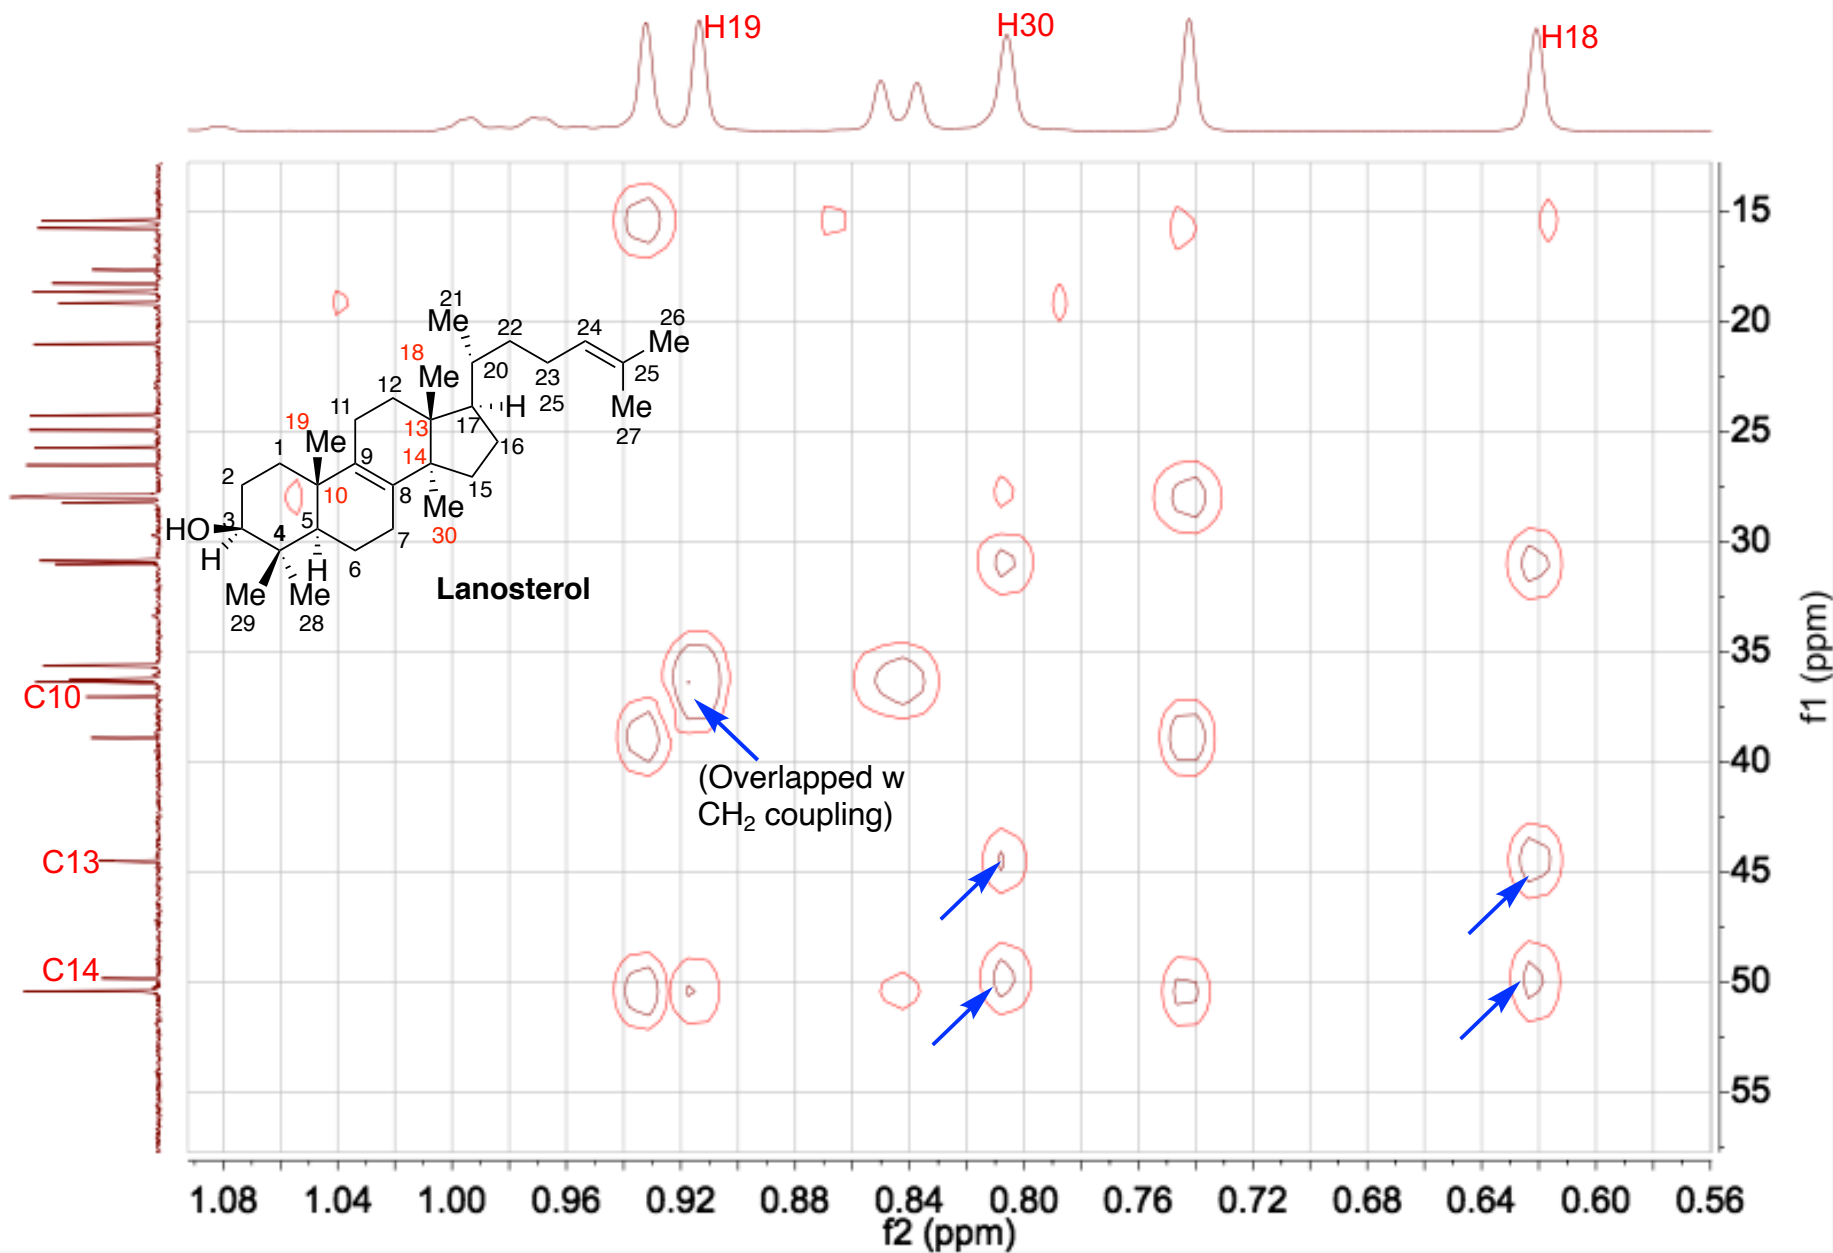



Figure S6. cont'd

D) Unknown HMBC

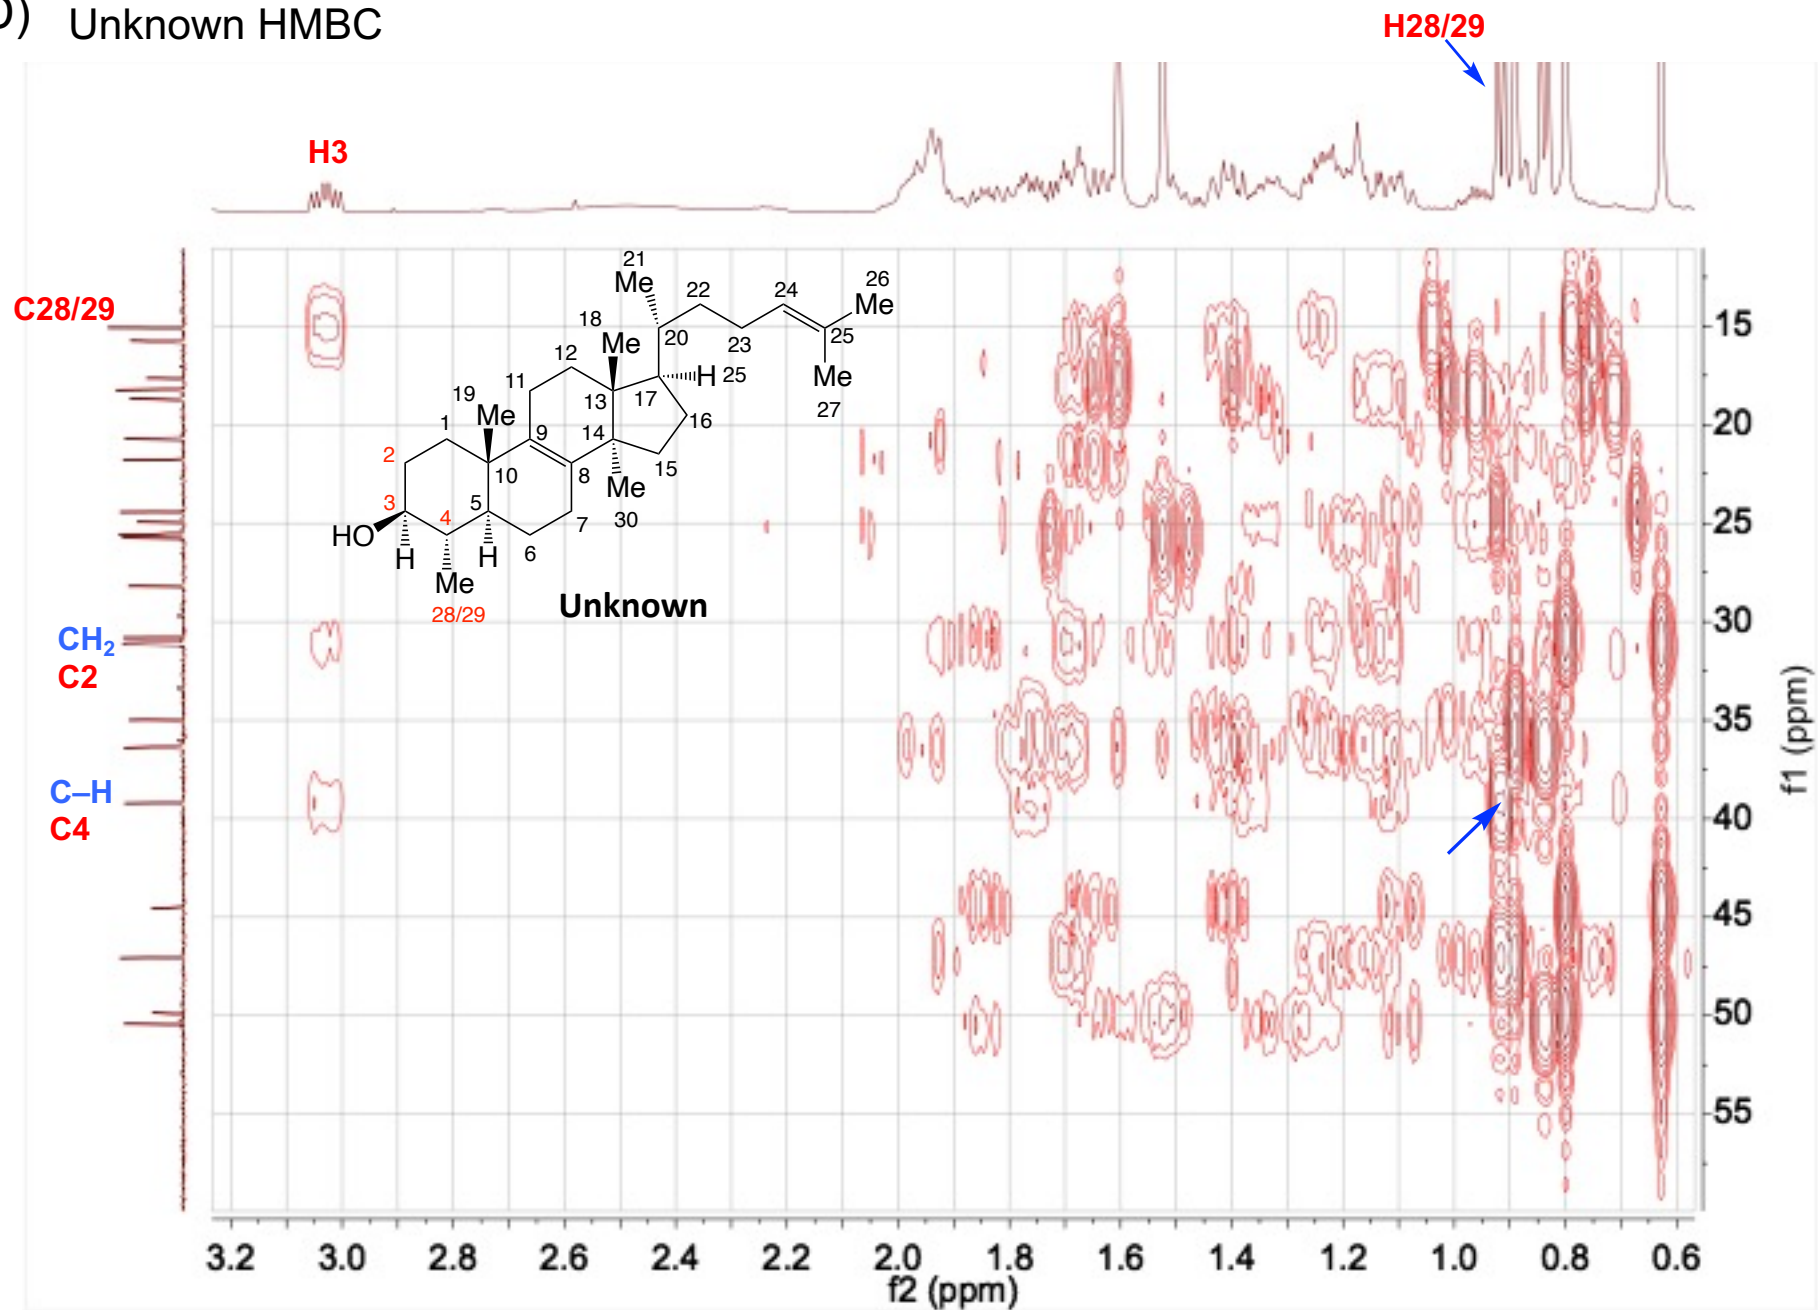

Figure S6. cont'd

E) Unknown HMBC - Establishing methyl's 18, 19, 30

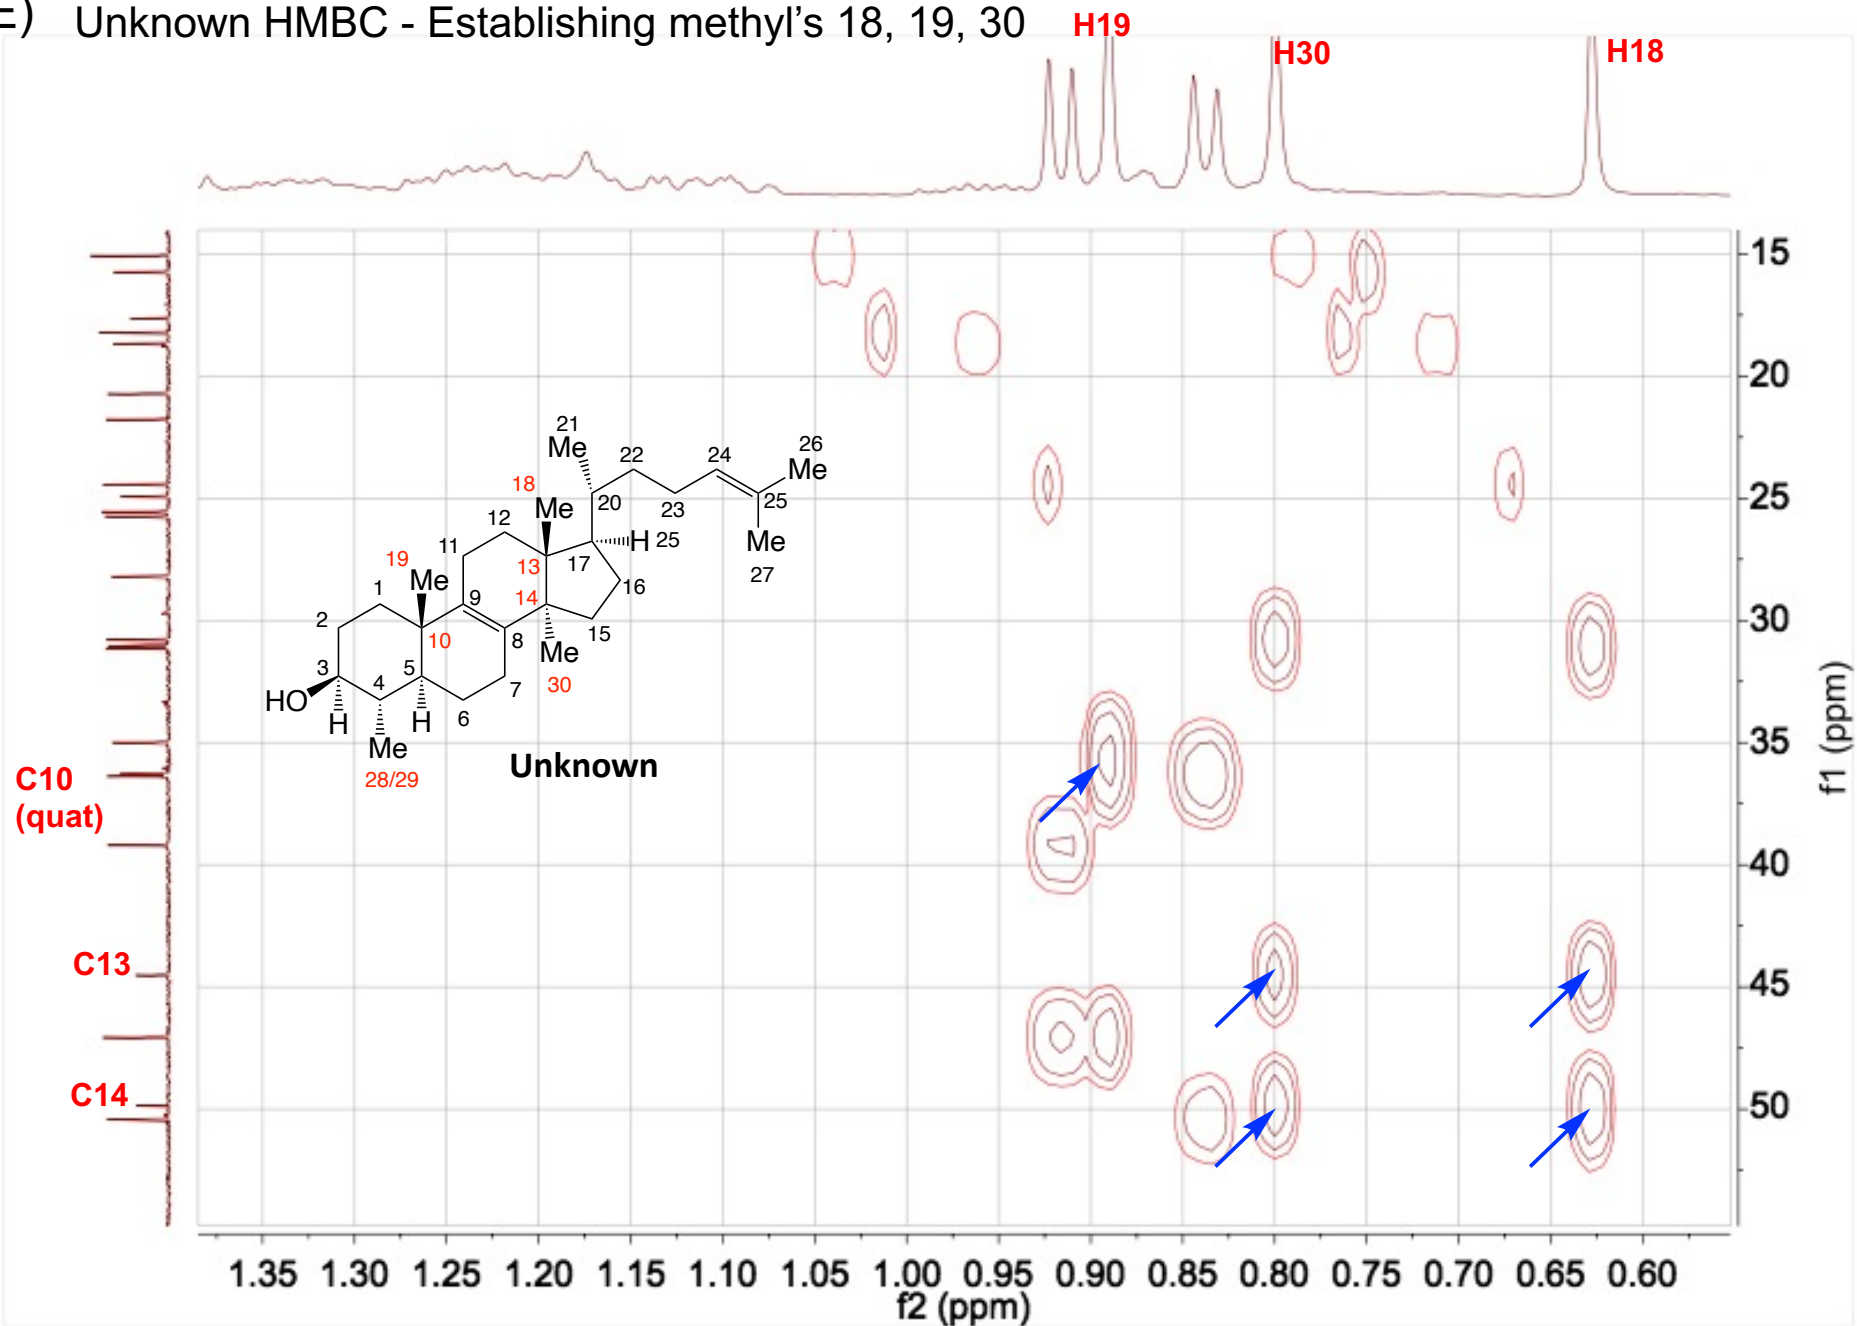

Figure S6. cont'd

F) Unknown HSQC - Locating H4 & H5 and assignment of corresponding  $^{13}\text{C}$  peaks

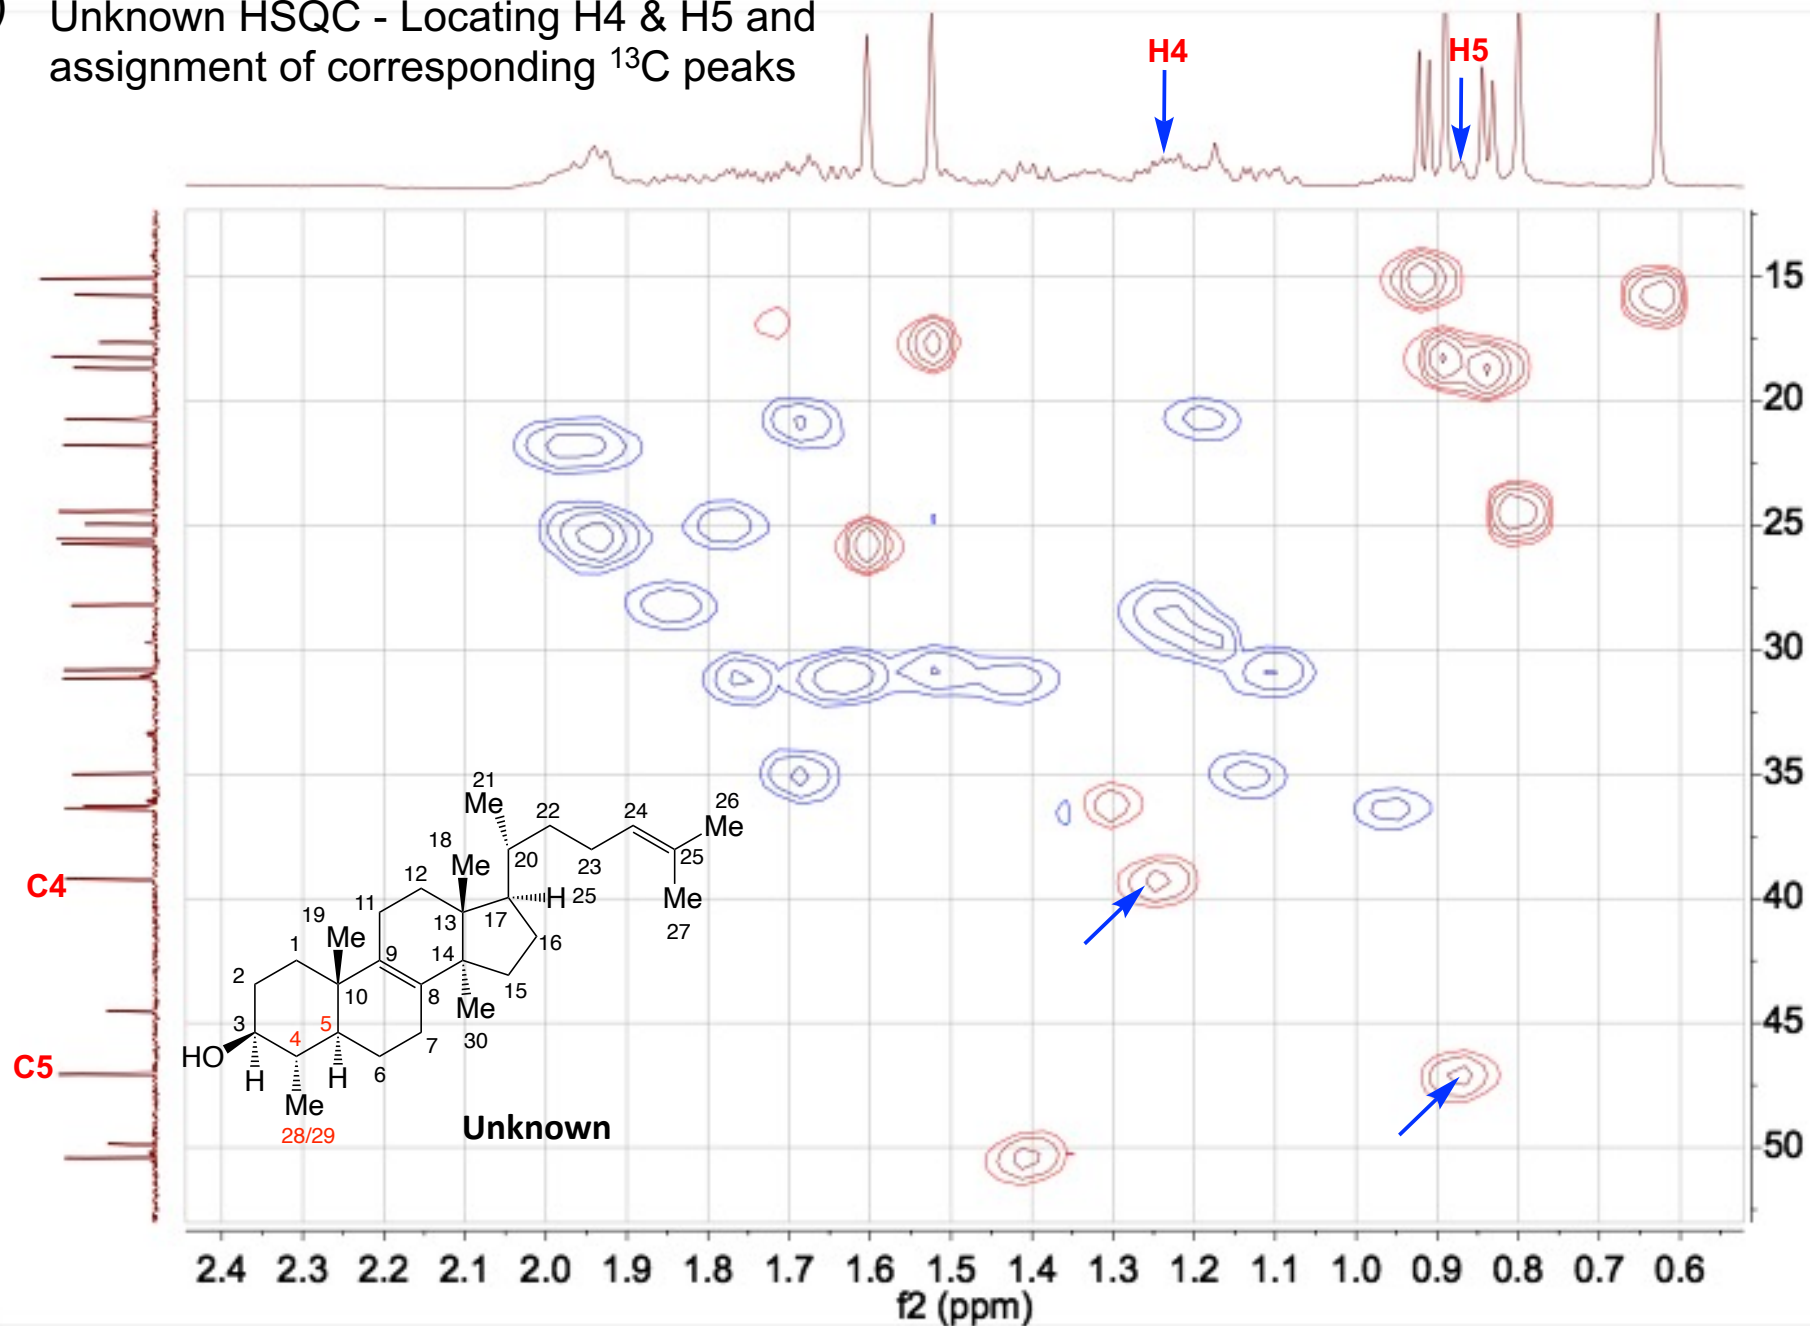

Supplement: mmc1.pdf [file mmc1.pdf]
